# Supplementary material
Source: PubMed Central journal article supplement (PMC8254373)
Supplement: 42238_2021_73_MOESM2_ESM.pdf [file 42238_2021_73_MOESM2_ESM.pdf]

## Consensus Voting Round 1 Results

Consensus Reached with ≥75%

n=16

Rationale for using medical cannabis in patients with chronic pain, include:

| #  | Question                                                                        | Strongly Disagree | Disagree | Neutral | Agree | Strongly agree | Abstain | Total | Strongly Disagree/Disagree | Strongly Agree/Agree |
|----|---------------------------------------------------------------------------------|-------------------|----------|---------|-------|----------------|---------|-------|----------------------------|----------------------|
| 1  | Reduction in pain intensity                                                     | 0.0%              | 0.0%     | 5.6%    | 16.7% | 77.8%          | 0.0%    | 18    | 0.0%                       | 94.5%                |
| 2  | Reduction in frequency of pain                                                  | 0.0%              | 5.6%     | 5.6%    | 44.4% | 44.4%          | 0.0%    | 18    | 5.6%                       | 88.9%                |
| 3  | Reduction in breakthrough pain frequency                                        | 0.0%              | 11.1%    | 5.6%    | 50.0% | 33.3%          | 0.0%    | 18    | 11.1%                      | 83.3%                |
| 4  | Improvement in patient physical function                                        | 0.0%              | 0.0%     | 5.6%    | 16.7% | 72.2%          | 5.6%    | 18    | 0.0%                       | 88.9%                |
| 5  | Improvement in patient activities of daily living                               | 0.0%              | 0.0%     | 5.6%    | 11.1% | 77.8%          | 5.6%    | 18    | 0.0%                       | 88.9%                |
| 6  | Improvement in mental health symptoms (e.g. distress, anxiety, depressed mood)  | 0.0%              | 0.0%     | 11.1%   | 44.4% | 38.9%          | 5.6%    | 18    | 0.0%                       | 83.3%                |
| 7  | Poor response to current treatment                                              | 0.0%              | 0.0%     | 0.0%    | 27.8% | 72.2%          | 0.0%    | 18    | 0.0%                       | 100.0%               |
| 8  | Management of patient's pain and comorbidities (e.g. insomnia, depression)      | 0.0%              | 0.0%     | 0.0%    | 44.4% | 50.0%          | 5.6%    | 18    | 0.0%                       | 94.4%                |
| 9  | Reduction in opioid use                                                         | 0.0%              | 0.0%     | 0.0%    | 38.9% | 61.1%          | 0.0%    | 18    | 0.0%                       | 100.0%               |
| 10 | Reduction in other analgesic use (e.g. acetaminophen (paracetamol), NSAIDs)     | 0.0%              | 11.1%    | 5.6%    | 50.0% | 33.3%          | 0.0%    | 18    | 11.1%                      | 83.3%                |
| 11 | Reduction in anti-depressant use                                                | 0.0%              | 22.2%    | 33.3%   | 27.8% | 16.7%          | 0.0%    | 18    | 22.2%                      | 44.5%                |
| 12 | Reduction in anti-epileptic use                                                 | 0.0%              | 22.2%    | 22.2%   | 38.9% | 16.7%          | 0.0%    | 18    | 22.2%                      | 55.6%                |
| 13 | Reduction in benzodiazepine use                                                 | 0.0%              | 0.0%     | 0.0%    | 50.0% | 50.0%          | 0.0%    | 18    | 0.0%                       | 100.0%               |
| 14 | Reduction in substance use (e.g. alcohol, illicit drug)                         | 0.0%              | 0.0%     | 5.6%    | 33.3% | 61.1%          | 0.0%    | 18    | 0.0%                       | 94.4%                |
| 15 | Reduction of adverse effects and risks from the patient's other pharmacotherapy | 0.0%              | 0.0%     | 5.6%    | 55.6% | 38.9%          | 0.0%    | 18    | 0.0%                       | 94.5%                |
| 16 | Patient preference for cannabis use                                             | 5.6%              | 5.6%     | 22.2%   | 50.0% | 16.7%          | 0.0%    | 18    | 11.1%                      | 66.7%                |

### Medical cannabis is likely effective for

| # | Question                                                              | Strongly Disagree | Disagree | Neutral | Agree | Strongly agree | Abstain | Total | Strongly Disagree/Disagree | Strongly Agree/Agree |
|---|-----------------------------------------------------------------------|-------------------|----------|---------|-------|----------------|---------|-------|----------------------------|----------------------|
| 1 | Chronic inflammatory pain (e.g. osteoarthritis, rheumatoid arthritis) | 0.0%              | 0.0%     | 5.6%    | 66.7% | 27.8%          | 0.0%    | 18    | 0.0%                       | 94.5%                |
| 2 | Chronic nociceptive pain with supraspinal sensitisation               | 0.0%              | 0.0%     | 0.0%    | 66.7% | 27.8%          | 5.6%    | 18    | 0.0%                       | 94.5%                |
| 3 | Chronic nociceptive pain without supraspinal sensitisation            | 0.0%              | 5.6%     | 22.2%   | 50.0% | 16.7%          | 5.6%    | 18    | 5.6%                       | 66.7%                |
| 4 | Chronic neuropathic pain (e.g. diabetic neuropathy)                   | 0.0%              | 0.0%     | 0.0%    | 22.2% | 72.2%          | 5.6%    | 18    | 0.0%                       | 94.4%                |
| 5 | Chronic visceral pain (e.g. pelvic pain)                              | 0.0%              | 0.0%     | 5.6%    | 72.2% | 22.2%          | 0.0%    | 18    | 0.0%                       | 94.4%                |
| 6 | Chronic traumatic pain                                                | 0.0%              | 0.0%     | 11.1%   | 55.6% | 27.8%          | 5.6%    | 18    | 0.0%                       | 83.3%                |
| 7 | Chronic cancer pain                                                   | 0.0%              | 0.0%     | 5.6%    | 38.9% | 55.6%          | 0.0%    | 18    | 0.0%                       | 94.5%                |
| 8 | Palliative Pain                                                       | 0.0%              | 0.0%     | 0.0%    | 44.4% | 50.0%          | 5.6%    | 18    | 0.0%                       | 94.4%                |
| 9 | Breakthrough pain                                                     | 0.0%              | 11.1%    | 11.1%   | 55.6% | 22.2%          | 0.0%    | 18    | 11.1%                      | 77.8%                |

### The minimum age for use of CBD in patients with chronic pain is:

| # | Answer          | %      |
|---|-----------------|--------|
| 1 | 30 years of age | 0.0%   |
| 2 | 25 years of age | 16.7%  |
| 3 | 21 years of age | 0.0%   |
| 4 | 18 years of age | 16.7%  |
| 5 | No minimum age  | 66.7%  |
| 6 | Abstain         | 0.0%   |
|   | Total           | 100.0% |

### The minimum age for use of THC in patients with chronic pain is:

| # | Answer          | %     |
|---|-----------------|-------|
| 1 | 30 years of age | 0.0%  |
| 2 | 25 years of age | 27.8% |
| 3 | 21 years of age | 27.8% |
| 4 | 18 years of age | 16.7% |
| 5 | No minimum age  | 27.8% |
| 6 | Abstain         | 0.0%  |

|       |        |
|-------|--------|
| Total | 100.0% |
|-------|--------|

The maximum age for use of CBD in patients with chronic pain is:

| # | Answer          | %      |
|---|-----------------|--------|
| 1 | 60 years of age | 0.0%   |
| 2 | 70 years of age | 0.0%   |
| 3 | 80 years of age | 0.0%   |
| 4 | 90 years of age | 0.0%   |
| 5 | No maximum age  | 100.0% |
| 6 | Abstain         | 0.0%   |
|   | Total           | 100.0% |

The maximum age for use of THC in patients with chronic pain is:

| # | Answer          | %      |
|---|-----------------|--------|
| 1 | 60 years of age | 0.0%   |
| 2 | 70 years of age | 0.0%   |
| 3 | 80 years of age | 5.6%   |
| 4 | 90 years of age | 0.0%   |
| 5 | No maximum age  | 94.4%  |
| 6 | Abstain         | 0.0%   |
|   | Total           | 100.0% |

Medical cannabis should be avoided in patients with chronic pain with the following conditions:

| #  | Question                                                                                                        | Strongly Disagree | Disagree | Neutral | Agree | Strongly agree | Abstain | Total | Strongly Disagree/Disagree | Strongly Agree/Agree |
|----|-----------------------------------------------------------------------------------------------------------------|-------------------|----------|---------|-------|----------------|---------|-------|----------------------------|----------------------|
| 1  | A patient with a psychotic disorder                                                                             | 0.0%              | 11.1%    | 0.0%    | 33.3% | 55.6%          | 0.0%    | 18    | 11.1%                      | 88.9%                |
| 2  | A patient with a family history of psychotic disorders                                                          | 11.1%             | 16.7%    | 33.3%   | 33.3% | 5.6%           | 0.0%    | 18    | 27.8%                      | 38.9%                |
| 3  | A patient with mood disorder                                                                                    | 16.7%             | 44.4%    | 22.2%   | 16.7% | 0.0%           | 0.0%    | 18    | 61.1%                      | 16.7%                |
| 4  | A patient with personality disorder                                                                             | 5.6%              | 38.9%    | 22.2%   | 16.7% | 16.7%          | 0.0%    | 18    | 44.5%                      | 33.3%                |
| 5  | A patient with substance abuse disorder                                                                         | 16.7%             | 22.2%    | 22.2%   | 16.7% | 22.2%          | 0.0%    | 18    | 38.9%                      | 38.9%                |
| 6  | A patient who is a heavy user of alcohol                                                                        | 16.7%             | 22.2%    | 22.2%   | 27.8% | 11.1%          | 0.0%    | 18    | 38.9%                      | 38.9%                |
| 7  | A patient who is taking high doses of prescribed opioids                                                        | 50.0%             | 33.3%    | 11.1%   | 5.6%  | 0.0%           | 0.0%    | 18    | 83.3%                      | 5.6%                 |
| 8  | A patient who is taking high doses benzodiazepines or other sedating medications prescribed or over the counter | 27.8%             | 38.9%    | 22.2%   | 5.6%  | 5.6%           | 0.0%    | 18    | 66.7%                      | 11.1%                |
| 9  | A patient with severe cardiovascular disease                                                                    | 5.6%              | 22.2%    | 22.2%   | 27.8% | 22.2%          | 0.0%    | 18    | 27.8%                      | 50.0%                |
| 10 | A patient who smokes tobacco                                                                                    | 44.4%             | 44.4%    | 11.1%   | 0.0%  | 0.0%           | 0.0%    | 18    | 88.9%                      | 0.0%                 |
| 11 | A patient with severe pulmonary disease for inhaled cannabis                                                    | 0.0%              | 27.8%    | 11.1%   | 33.3% | 27.8%          | 0.0%    | 18    | 27.8%                      | 61.1%                |
| 12 | A patient with severe renal disease                                                                             | 27.8%             | 38.9%    | 16.7%   | 16.7% | 0.0%           | 0.0%    | 18    | 66.7%                      | 16.7%                |
| 13 | A patient with severe hepatic disease                                                                           | 16.7%             | 27.8%    | 16.7%   | 38.9% | 0.0%           | 0.0%    | 18    | 44.5%                      | 38.9%                |
| 14 | Pediatric patients                                                                                              | 22.2%             | 27.8%    | 11.1%   | 27.8% | 11.1%          | 0.0%    | 18    | 50.0%                      | 38.9%                |
| 15 | Geriatric patients (>65 years)                                                                                  | 61.1%             | 33.3%    | 0.0%    | 5.6%  | 0.0%           | 0.0%    | 18    | 94.4%                      | 5.6%                 |
| 16 | A patient with social instability                                                                               | 11.1%             | 38.9%    | 27.8%   | 22.2% | 0.0%           | 0.0%    | 18    | 50.0%                      | 22.2%                |
| 17 | A patient with immunosuppression                                                                                | 22.2%             | 38.9%    | 33.3%   | 0.0%  | 5.6%           | 0.0%    | 18    | 61.1%                      | 5.6%                 |
| 18 | A patient who is pregnant or planning to become pregnant                                                        | 0.0%              | 5.6%     | 5.6%    | 22.2% | 61.1%          | 5.6%    | 18    | 5.6%                       | 83.3%                |
| 19 | A patient who is breastfeeding                                                                                  | 0.0%              | 5.6%     | 0.0%    | 27.8% | 61.1%          | 5.6%    | 18    | 5.6%                       | 88.9%                |

Medical cannabis should be avoided in patients with chronic pain being administered the following medications:

| #  | Question                                                   | Strongly Disagree | Disagree | Neutral | Agree | Strongly agree | Abstain | Total | Strongly Disagree/Disagree | Strongly Agree/Agree |
|----|------------------------------------------------------------|-------------------|----------|---------|-------|----------------|---------|-------|----------------------------|----------------------|
| 1  | Warfarin                                                   | 5.9%              | 52.9%    | 17.7%   | 11.8% | 11.8%          | 0.0%    | 17    | 58.8%                      | 23.5%                |
| 2  | Direct oral anticoagulants (DOACs)                         | 5.9%              | 52.9%    | 11.8%   | 17.7% | 11.8%          | 0.0%    | 17    | 58.8%                      | 29.4%                |
| 3  | Opioids                                                    | 50.0%             | 38.9%    | 5.6%    | 0.0%  | 5.6%           | 0.0%    | 18    | 88.9%                      | 5.6%                 |
| 4  | Opioid agonist treatment (e.g. methadone or buprenorphine) | 47.1%             | 47.1%    | 5.9%    | 0.0%  | 0.0%           | 0.0%    | 17    | 94.1%                      | 0.0%                 |
| 5  | Benzodiazepines                                            | 33.3%             | 55.6%    | 5.6%    | 5.6%  | 0.0%           | 0.0%    | 18    | 88.9%                      | 5.6%                 |
| 6  | Skeletal muscle relaxants                                  | 41.2%             | 47.1%    | 11.8%   | 0.0%  | 0.0%           | 0.0%    | 17    | 88.2%                      | 0.0%                 |
| 7  | Hypnotics                                                  | 22.2%             | 61.1%    | 11.1%   | 5.6%  | 0.0%           | 0.0%    | 18    | 83.3%                      | 5.6%                 |
| 8  | Non-steroidal anti-inflammatory drugs (NSAIDs)             | 44.4%             | 55.6%    | 0.0%    | 0.0%  | 0.0%           | 0.0%    | 18    | 100.0%                     | 0.0%                 |
| 9  | Antidepressants                                            | 38.9%             | 55.6%    | 5.6%    | 0.0%  | 0.0%           | 0.0%    | 18    | 94.5%                      | 0.0%                 |
| 10 | Anti-psychotics                                            | 22.2%             | 44.4%    | 22.2%   | 5.6%  | 5.6%           | 0.0%    | 18    | 66.7%                      | 11.1%                |
| 11 | Corticosteroids                                            | 38.9%             | 50.0%    | 11.1%   | 0.0%  | 0.0%           | 0.0%    | 18    | 88.9%                      | 0.0%                 |
| 12 | Anti-hypercholesterolemic agents                           | 44.4%             | 50.0%    | 5.6%    | 0.0%  | 0.0%           | 0.0%    | 18    | 94.4%                      | 0.0%                 |
| 13 | Antihypertensive agents                                    | 38.9%             | 55.6%    | 5.6%    | 0.0%  | 0.0%           | 0.0%    | 18    | 94.5%                      | 0.0%                 |

|    |                                                                               |       |       |       |       |      |       |    |       |       |
|----|-------------------------------------------------------------------------------|-------|-------|-------|-------|------|-------|----|-------|-------|
| 14 | Antimicrobial agents                                                          | 38.9% | 50.0% | 5.6%  | 0.0%  | 0.0% | 5.6%  | 18 | 88.9% | 0.0%  |
| 15 | Anti-epileptic agents (including clobazam)                                    | 16.7% | 61.1% | 16.7% | 5.6%  | 0.0% | 0.0%  | 18 | 77.8% | 5.6%  |
| 16 | Antihyperglycemic agents                                                      | 38.9% | 55.6% | 0.0%  | 0.0%  | 0.0% | 5.6%  | 18 | 94.5% | 0.0%  |
| 17 | Cyclosporine or tacrolimus                                                    | 22.2% | 55.6% | 11.1% | 0.0%  | 5.6% | 5.6%  | 18 | 77.8% | 5.6%  |
| 18 | Cancer chemotherapy                                                           | 44.4% | 38.9% | 11.1% | 0.0%  | 0.0% | 5.6%  | 18 | 83.3% | 0.0%  |
| 19 | Disease modifying synthetic anti-rheumatic drugs (DMARDs)                     | 38.9% | 44.4% | 11.1% | 0.0%  | 0.0% | 5.6%  | 18 | 83.3% | 0.0%  |
| 20 | Biologic therapies for rheumatoid arthritis, inflammatory bowel disease, etc. | 38.9% | 38.9% | 16.7% | 0.0%  | 0.0% | 5.6%  | 18 | 77.8% | 0.0%  |
| 21 | Immunotherapy agents for oncology (e.g. checkpoint inhibitors)                | 27.8% | 22.2% | 27.8% | 11.1% | 0.0% | 11.1% | 18 | 50.0% | 11.1% |

**The starting THC:CBD ratio for most patients with chronic pain should be:**

| # | Question         | Strongly Disagree | Disagree | Neutral | Agree | Strongly agree | Abstain | Total | Strongly Disagree/Disagree | Strongly Agree/Agree |
|---|------------------|-------------------|----------|---------|-------|----------------|---------|-------|----------------------------|----------------------|
| 1 | CBD predominant  | 5.9%              | 5.9%     | 5.9%    | 58.8% | 23.5%          | 0.0%    | 17    | 11.8%                      | 82.4%                |
| 2 | Balanced THC:CBD | 5.6%              | 0.0%     | 16.7%   | 44.4% | 33.3%          | 0.0%    | 18    | 5.6%                       | 77.8%                |
| 3 | THC predominant  | 12.5%             | 50.0%    | 6.3%    | 18.8% | 12.5%          | 0.0%    | 16    | 62.5%                      | 31.3%                |

**The starting CBD daily dose for most patients is: (total amount in 24 hours)**

| # | Answer  | %      |
|---|---------|--------|
| 1 | 5 mg    | 22.2%  |
| 2 | 10 mg   | 50.0%  |
| 3 | 20 mg   | 5.6%   |
| 4 | 40 mg   | 0.0%   |
| 5 | 50 mg   | 5.6%   |
| 6 | > 50 mg | 16.7%  |
| 7 | Abstain | 0.0%   |
|   | Total   | 100.0% |

**The recommended starting dosing frequency for CBD is: (Daily dose divided into this frequency)**

| # | Answer            | %      |
|---|-------------------|--------|
| 1 | Once daily        | 33.3%  |
| 2 | Twice daily       | 66.7%  |
| 3 | Three times daily | 0.0%   |
| 4 | Four times daily  | 0.0%   |
| 5 | > 4 times daily   | 0.0%   |
| 6 | Abstain           | 0.0%   |
|   | Total             | 100.0% |

**The recommended CBD titration amount for most patients is:**

| # | Answer  | %      |
|---|---------|--------|
| 1 | 1 mg    | 5.6%   |
| 2 | 5 mg    | 33.3%  |
| 3 | 10 mg   | 38.9%  |
| 4 | 20 mg   | 11.1%  |
| 5 | > 20 mg | 11.1%  |
| 6 | Abstain | 0.0%   |
|   | Total   | 100.0% |

**The recommended CBD up-titration frequency for most patients is:**

| # | Answer           | %      |
|---|------------------|--------|
| 1 | Daily            | 11.1%  |
| 2 | Every other day  | 5.6%   |
| 3 | 2-3 times a week | 38.9%  |
| 4 | Once a week      | 38.9%  |
| 5 | every 2 weeks    | 5.6%   |
| 6 | Abstain          | 0.0%   |
|   | Total            | 100.0% |

**If starting with a CBD predominant variety, THC for most patients should be introduced:**

| # | Question                                                                                                     | Strongly Disagree | Disagree | Neutral | Agree | Strongly agree | Abstain | Total | Strongly Disagree/Disagree | Strongly Agree/Agree |
|---|--------------------------------------------------------------------------------------------------------------|-------------------|----------|---------|-------|----------------|---------|-------|----------------------------|----------------------|
| 1 | 1 If needed, add THC at bedtime after one week regardless of CBD dose                                        | 5.9%              | 47.1%    | 29.4%   | 17.7% | 0.0%           | 0.0%    | 17    | 52.9%                      | 17.7%                |
| 2 | 2 If needed, add THC at bedtime after two weeks regardless of CBD dose                                       | 5.9%              | 47.1%    | 29.4%   | 17.7% | 0.0%           | 0.0%    | 17    | 52.9%                      | 17.7%                |
| 3 | 3 If needed, add THC at bedtime once patient is taking > 20mg of CBD                                         | 5.6%              | 11.1%    | 22.2%   | 38.9% | 16.7%          | 5.6%    | 18    | 16.7%                      | 55.6%                |
| 4 | 4 If needed, add THC at bedtime once patient is taking > 40mg of CBD                                         | 5.9%              | 23.5%    | 23.5%   | 23.5% | 23.5%          | 0.0%    | 17    | 29.4%                      | 47.1%                |
| 5 | 5 If needed add THC at bedtime when the patient is not the maximally tolerated or afforded CBD dose          | 0.0%              | 25.0%    | 18.8%   | 25.0% | 25.0%          | 6.3%    | 16    | 25.0%                      | 50.0%                |
| 6 | 6 I do not recommend starting with CBD predominant before initiating THC for most patients with chronic pain | 27.8%             | 22.2%    | 16.7%   | 5.6%  | 22.2%          | 5.6%    | 18    | 50.0%                      | 27.8%                |

**The recommended starting THC daily dose for most patients: (amount for 24 hours)**

| # | Answer    | %      |
|---|-----------|--------|
| 1 | 1 1 mg    | 27.8%  |
| 2 | 2 2.5 mg  | 66.7%  |
| 3 | 3 5 mg    | 5.6%   |
| 4 | 4 10 mg   | 0.0%   |
| 5 | 5 Abstain | 0.0%   |
|   | Total     | 100.0% |

**The recommended THC titration amount for most patients is:**

| # | Answer    | %      |
|---|-----------|--------|
| 1 | 1 1 mg    | 27.8%  |
| 2 | 2 2.5 mg  | 72.2%  |
| 3 | 3 5 mg    | 0.0%   |
| 4 | 4 10 mg   | 0.0%   |
| 5 | 5 Abstain | 0.0%   |
|   | Total     | 100.0% |

**The recommended THC up-titration frequency for most patients is:**

| # | Answer             | %      |
|---|--------------------|--------|
| 1 | 1 Daily            | 11.1%  |
| 2 | 2 Every other day  | 5.6%   |
| 3 | 3 2-3 times a week | 44.4%  |
| 4 | 4 Once a week      | 27.8%  |
| 5 | 5 Every 2 weeks    | 11.1%  |
| 6 | 6 Abstain          | 0.0%   |
|   | Total              | 100.0% |

**The recommended maximum daily dose of CBD is:**

| # | Answer                  | %      |
|---|-------------------------|--------|
| 1 | 1 50 mg                 | 5.9%   |
| 2 | 2 100 mg                | 5.9%   |
| 3 | 3 300 mg                | 29.4%  |
| 4 | 4 600 mg                | 11.8%  |
| 5 | 5 No maximum daily dose | 41.2%  |
| 6 | 6 Abstain               | 5.9%   |
|   | Total                   | 100.0% |

**The recommended maximum daily dose of THC is:**

| # | Answer                  | %      |
|---|-------------------------|--------|
| 1 | 1 10 mg                 | 0.0%   |
| 2 | 2 20 mg                 | 23.5%  |
| 3 | 3 40 mg                 | 41.2%  |
| 4 | 4 80 mg                 | 17.7%  |
| 5 | 5 No maximum daily dose | 17.7%  |
| 6 | 6 Abstain               | 0.0%   |
|   | Total                   | 100.0% |

**The patients and conditions that should be considered for rapid/aggressive medical cannabis dosing and titration are:**

---

| # | Question                                                                                 | Strongly Disagree | Disagree | Neutral | Agree | Strongly agree | Abstain | Total | Strongly Disagree/Disagree | Strongly Agree/Agree |
|---|------------------------------------------------------------------------------------------|-------------------|----------|---------|-------|----------------|---------|-------|----------------------------|----------------------|
| 1 | The patient is cannabis experienced (medical or recreational)                            | 0.0%              | 0.0%     | 11.1%   | 55.6% | 33.3%          | 0.0%    | 18    | 0.0%                       | 88.9%                |
| 2 | The patient is taking > 90 mg morphine equivalent dose (MED)                             | 5.6%              | 33.3%    | 16.7%   | 38.9% | 5.6%           | 0.0%    | 18    | 38.9%                      | 44.5%                |
| 3 | The patient is suffering for severe pain or with severe functional impairment            | 0.0%              | 16.7%    | 0.0%    | 72.2% | 11.1%          | 0.0%    | 18    | 16.7%                      | 83.3%                |
| 4 | The patient who is currently using opioids, gabapentinoids or SNRIs                      | 0.0%              | 55.6%    | 27.8%   | 11.1% | 5.6%           | 0.0%    | 18    | 55.6%                      | 16.7%                |
| 5 | The patient who is has been unsuccessfully treated with opioids, gabapentinoids or SNRIs | 0.0%              | 38.9%    | 27.8%   | 22.2% | 11.1%          | 0.0%    | 18    | 38.9%                      | 33.3%                |
| 6 | The patient is experiencing primarily neuropathic pain                                   | 0.0%              | 50.0%    | 16.7%   | 16.7% | 16.7%          | 0.0%    | 18    | 50.0%                      | 33.3%                |
| 7 | Palliative care or end of life                                                           | 0.0%              | 5.6%     | 0.0%    | 55.6% | 38.9%          | 0.0%    | 18    | 5.6%                       | 94.5%                |
| 8 | Lack of efficacy at low/moderate cannabis doses                                          | 0.0%              | 11.1%    | 16.7%   | 38.9% | 33.3%          | 0.0%    | 18    | 11.1%                      | 72.2%                |

The recommended starting THC:CBD ratio for patients with chronic pain requiring rapid/aggressive dosing and titration is:

| # | Question         | Strongly Disagree | Disagree | Neutral | Agree | Strongly agree | Abstain | Total | Strongly Disagree/Disagree | Strongly Agree/Agree |
|---|------------------|-------------------|----------|---------|-------|----------------|---------|-------|----------------------------|----------------------|
| 1 | CBD predominant  | 12.5%             | 25.0%    | 12.5%   | 25.0% | 25.0%          | 0.0%    | 16    | 37.5%                      | 50.0%                |
| 2 | Balanced THC:CBD | 0.0%              | 0.0%     | 16.7%   | 55.6% | 27.8%          | 0.0%    | 18    | 0.0%                       | 83.3%                |
| 3 | THC predominant  | 0.0%              | 41.2%    | 11.8%   | 29.4% | 17.7%          | 0.0%    | 17    | 41.2%                      | 47.1%                |

The recommended starting THC daily dose for patients with chronic pain requiring rapid/aggressive dosing and titration: (amount for 24 hours)

| # | Answer  | %      |
|---|---------|--------|
| 1 | 1 mg    | 11.1%  |
| 2 | 2.5 mg  | 38.9%  |
| 3 | 5 mg    | 38.9%  |
| 4 | 10 mg   | 5.6%   |
| 5 | Abstain | 5.6%   |
|   | Total   | 100.0% |

The recommended starting dosing frequency of THC for patients with chronic pain requiring rapid/aggressive dosing and titration: (Daily dose divided into this frequency)

| # | Answer            | %      |
|---|-------------------|--------|
| 1 | Once daily        | 22.2%  |
| 2 | Twice daily       | 55.6%  |
| 3 | Three times daily | 16.7%  |
| 4 | Four times daily  | 0.0%   |
| 5 | > 4 times daily   | 0.0%   |
| 6 | Abstain           | 5.6%   |
|   | Total             | 100.0% |

The recommended THC up-titration frequency for patients with chronic pain requiring rapid/aggressive dosing and titration:

| # | Answer           | %      |
|---|------------------|--------|
| 1 | Daily            | 27.8%  |
| 2 | Every other day  | 22.2%  |
| 3 | 2-3 times a week | 38.9%  |
| 4 | Once a week      | 5.6%   |
| 5 | Every 2 weeks    | 0.0%   |
| 6 | Abstain          | 5.6%   |
|   | Total            | 100.0% |

The recommended maximum daily dose of THC for patients with chronic pain requiring rapid/aggressive dosing and titration:

| # | Answer                | %      |
|---|-----------------------|--------|
| 1 | 10 mg                 | 0.0%   |
| 2 | 20 mg                 | 5.6%   |
| 3 | 40 mg                 | 38.9%  |
| 4 | 80 mg                 | 16.7%  |
| 5 | No maximum daily dose | 33.3%  |
| 6 | Abstain               | 5.6%   |
|   | Total                 | 100.0% |

The starting CBD daily dose for patients with chronic pain requiring rapid/aggressive dosing and titration: (total amount in 24 hours)

| # | Answer                      | %      |
|---|-----------------------------|--------|
| 1 | 5 mg                        | 11.1%  |
| 2 | 10 mg                       | 27.8%  |
| 3 | 20 mg                       | 33.3%  |
| 4 | 40 mg                       | 0.0%   |
| 5 | 50 mg                       | 0.0%   |
| 6 | > 50 mg                     | 16.7%  |
| 7 | I would start with THC only | 11.1%  |
| 8 | Abstain                     | 0.0%   |
|   | Total                       | 100.0% |

**The recommended starting dosing frequency of CBD for patients with chronic pain requiring rapid/aggressive dosing and titration: (Daily dose divided into this frequency)**

| # | Answer                      | %      |
|---|-----------------------------|--------|
| 1 | Once daily                  | 16.7%  |
| 2 | Twice daily                 | 55.6%  |
| 3 | Three times daily           | 16.7%  |
| 4 | Four times daily            | 0.0%   |
| 5 | > 4 times daily             | 0.0%   |
| 6 | I would start with THC only | 5.6%   |
| 7 | Abstain                     | 5.6%   |
|   | Total                       | 100.0% |

**The recommended CBD titration amount for patients with chronic pain requiring rapid/aggressive dosing and titration:**

| # | Answer                      | %      |
|---|-----------------------------|--------|
| 1 | 1 mg                        | 0.0%   |
| 2 | 5 mg                        | 22.2%  |
| 3 | 10 mg                       | 22.2%  |
| 4 | 20 mg                       | 33.3%  |
| 5 | > 20 mg                     | 5.6%   |
| 6 | I would start with THC only | 11.1%  |
| 7 | Abstain                     | 5.6%   |
|   | Total                       | 100.0% |

**The recommended CBD up-titration frequency**

| # | Answer           | %      |
|---|------------------|--------|
| 1 | Daily            | 33.3%  |
| 2 | Every other day  | 16.7%  |
| 3 | 2-3 times a week | 38.9%  |
| 4 | Once a week      | 5.6%   |
| 5 | Every 2 weeks    | 0.0%   |
| 6 | Abstain          | 5.6%   |
|   | Total            | 100.0% |

**The recommended maximum daily dose of CBD**

| # | Answer                      | %      |
|---|-----------------------------|--------|
| 1 | 50 mg                       | 0.0%   |
| 2 | 100 mg                      | 11.1%  |
| 3 | 300 mg                      | 16.7%  |
| 4 | 600 mg                      | 11.1%  |
| 5 | No maximum daily dose       | 44.4%  |
| 6 | I would start with THC only | 11.1%  |
| 7 | Abstain                     | 5.6%   |
|   | Total                       | 100.0% |

**The patients and conditions should be considered for conservative medical cannabis dosing and titration:**

| # | Question           | Strongly Disagree | Disagree | Neutral | Agree | Strongly agree | Abstain | Total | Strongly Disagree/ Disagree | Strongly Agree/ Agree |
|---|--------------------|-------------------|----------|---------|-------|----------------|---------|-------|-----------------------------|-----------------------|
| 1 | Patient > 65 years | 0.0%              | 5.6%     | 16.7%   | 66.7% | 11.1%          | 0.0%    | 18    | 5.6%                        | 77.8%                 |
| 2 | Patient > 70 years | 0.0%              | 0.0%     | 5.9%    | 64.7% | 29.4%          | 0.0%    | 17    | 0.0%                        | 94.1%                 |
| 3 | Patient > 80 years | 0.0%              | 0.0%     | 0.0%    | 11.8% | 88.2%          | 0.0%    | 17    | 0.0%                        | 100.0%                |



|   |                                       |      |       |       |       |       |      |    |       |        |
|---|---------------------------------------|------|-------|-------|-------|-------|------|----|-------|--------|
| 4 | Patient with clinical frailty         | 0.0% | 0.0%  | 0.0%  | 38.9% | 61.1% | 0.0% | 18 | 0.0%  | 100.0% |
| 5 | Patient with mental health disorders  | 0.0% | 11.1% | 5.6%  | 16.7% | 66.7% | 0.0% | 18 | 11.1% | 83.3%  |
| 6 | Patient with cardiovascular disorders | 0.0% | 5.6%  | 11.1% | 38.9% | 44.4% | 0.0% | 18 | 5.6%  | 83.3%  |
| 7 | Patient with complex comorbidities    | 0.0% | 0.0%  | 5.6%  | 50.0% | 44.4% | 0.0% | 18 | 0.0%  | 94.4%  |
| 8 | Patient with polypharmacy             | 0.0% | 0.0%  | 0.0%  | 72.2% | 27.8% | 0.0% | 18 | 0.0%  | 100.0% |

The recommended starting THC:CBD ratio for patients with chronic pain requiring conservative dosing and titration is:

| # | Question           | Strongly Disagree | Disagree | Neutral | Agree | Strongly agree | Abstain | Total | Strongly Disagree/Disagree | Strongly Agree/Agree |
|---|--------------------|-------------------|----------|---------|-------|----------------|---------|-------|----------------------------|----------------------|
| 1 | 1 CBD predominant  | 5.6%              | 11.1%    | 5.6%    | 33.3% | 44.4%          | 0.0%    | 18    | 16.7%                      | 77.8%                |
|   | 2 Balanced THC:CBD | 11.8%             | 11.8%    | 11.8%   | 58.8% | 5.9%           | 0.0%    | 17    | 23.5%                      | 64.7%                |
|   | 3 THC predominant  | 17.7%             | 52.9%    | 17.7%   | 0.0%  | 11.8%          | 0.0%    | 17    | 70.6%                      | 11.8%                |

The starting CBD daily dose for patients with chronic pain requiring conservative dosing and titration: (total amount in 24 hours)

| # | Answer  | %      |
|---|---------|--------|
| 1 | 5 mg    | 55.6%  |
| 2 | 10 mg   | 22.2%  |
| 3 | 20 mg   | 5.6%   |
| 4 | 40 mg   | 0.0%   |
| 5 | 50 mg   | 5.6%   |
| 6 | > 50 mg | 11.1%  |
| 7 | Abstain | 0.0%   |
|   | Total   | 100.0% |

The recommended the CBD titration amount for patients with chronic pain requiring conservative dosing and titration:

| # | Answer  | %      |
|---|---------|--------|
| 1 | 1 mg    | 22.2%  |
| 2 | 5 mg    | 33.3%  |
| 3 | 10 mg   | 16.7%  |
| 4 | 20 mg   | 5.6%   |
| 5 | > 20 mg | 22.2%  |
| 6 | Abstain | 0.0%   |
|   | Total   | 100.0% |

The recommended the CBD up-titration frequency

| # | Answer           | %      |
|---|------------------|--------|
| 1 | Daily            | 11.1%  |
| 2 | Every other day  | 5.6%   |
| 3 | 2-3 times a week | 22.2%  |
| 4 | Once a week      | 38.9%  |
| 5 | Every 2 weeks    | 22.2%  |
| 6 | Abstain          | 0.0%   |
|   | Total            | 100.0% |

The recommended maximum daily dose of CBD for patients with chronic pain requiring conservative dosing and titration:

| # | Answer                | %      |
|---|-----------------------|--------|
| 1 | 50 mg                 | 5.6%   |
| 2 | 100 mg                | 22.2%  |
| 3 | 300 mg                | 27.8%  |
| 4 | 600 mg                | 0.0%   |
| 5 | No maximum daily dose | 33.3%  |
| 6 | Abstain               | 11.1%  |
|   | Total                 | 100.0% |

If starting with an CBD predominant variety, THC for patients with chronic pain requiring conservative dosing and titration should be introduced:

| # | Question                                                              | Strongly Disagree | Disagree | Neutral | Agree | Strongly agree | Abstain | Total | Strongly Disagree/Disagree | Strongly Agree/Agree |
|---|-----------------------------------------------------------------------|-------------------|----------|---------|-------|----------------|---------|-------|----------------------------|----------------------|
| 1 | 1 If needed, add THC at bedtime after one week regardless of CBD dose | 16.7%             | 44.4%    | 11.1%   | 16.7% | 11.1%          | 0.0%    | 18    | 61.1%                      | 27.8%                |

|   |                                                                                                          |       |       |       |       |       |       |    |       |       |
|---|----------------------------------------------------------------------------------------------------------|-------|-------|-------|-------|-------|-------|----|-------|-------|
| 2 | If needed, add THC at bedtime after two weeks regardless of CBD dose                                     | 11.8% | 52.9% | 5.9%  | 17.7% | 11.8% | 0.0%  | 17 | 64.7% | 29.4% |
| 3 | If needed, add THC at bedtime once patient is taking > 20mg of CBD                                       | 11.8% | 35.3% | 23.5% | 23.5% | 5.9%  | 0.0%  | 17 | 47.1% | 29.4% |
| 4 | If needed, add THC at bedtime once patient is taking > 40mg of CBD                                       | 5.9%  | 23.5% | 23.5% | 47.1% | 0.0%  | 0.0%  | 17 | 29.4% | 47.1% |
| 5 | If needed add THC at bedtime when the patient is not the maximally tolerated or afforded CBD dose        | 5.9%  | 11.8% | 17.7% | 47.1% | 11.8% | 5.9%  | 17 | 17.6% | 58.8% |
| 6 | do not recommend starting with CBD predominant before initiating THC for most patients with chronic pain | 31.3% | 31.3% | 6.3%  | 6.3%  | 12.5% | 12.5% | 16 | 62.5% | 18.8% |

**The recommended starting THC daily dose for patients with chronic pain requiring conservative dosing and titration: (amount for 24 hours)**

| # | Answer                                  | %      |
|---|-----------------------------------------|--------|
| 1 | 1 mg                                    | 72.2%  |
| 2 | 2.5 mg                                  | 27.8%  |
| 3 | 5 mg                                    | 0.0%   |
| 4 | 10 mg                                   | 0.0%   |
| 5 | I don't recommend THC in these patients | 0.0%   |
| 6 | Abstain                                 | 0.0%   |
|   | Total                                   | 100.0% |

**The recommended starting dosing frequency for THC for patients with chronic pain requiring conservative dosing and titration: (Daily dose divided into this frequency)**

| # | Answer                                  | %      |
|---|-----------------------------------------|--------|
| 1 | Once daily                              | 83.3%  |
| 2 | Twice daily                             | 11.1%  |
| 3 | Three times daily                       | 5.6%   |
| 4 | Four times daily                        | 0.0%   |
| 5 | > 4 times daily                         | 0.0%   |
| 6 | I don't recommend THC in these patients | 0.0%   |
| 7 | Abstain                                 | 0.0%   |
|   | Total                                   | 100.0% |

**The recommended THC up-titration frequency for patients with chronic pain requiring conservative dosing and titration:**

| # | Answer                                  | %      |
|---|-----------------------------------------|--------|
| 1 | Daily                                   | 5.6%   |
| 2 | Every other day                         | 5.6%   |
| 3 | 2-3 times a week                        | 27.8%  |
| 4 | Once a week                             | 38.9%  |
| 5 | Every 2 weeks                           | 22.2%  |
| 6 | I don't recommend THC in these patients | 0.0%   |
| 7 | Abstain                                 | 0.0%   |
|   | Total                                   | 100.0% |

**The recommended maximum daily dose of THC for patients with chronic pain requiring conservative dosing and titration:**

| # | Answer                                  | %      |
|---|-----------------------------------------|--------|
| 1 | 10 mg                                   | 11.1%  |
| 2 | 20 mg                                   | 50.0%  |
| 3 | 40 mg                                   | 11.1%  |
| 4 | 80 mg                                   | 5.6%   |
| 5 | No maximum daily dose                   | 22.2%  |
| 6 | I don't recommend THC in these patients | 0.0%   |
| 7 | Abstain                                 | 0.0%   |
|   | Total                                   | 100.0% |

**The patients where inhaled cannabis should be considered for chronic pain management.**

| # | Question                                                      | Strongly Disagree | Disagree | Neutral | Agree | Strongly agree | Abstain | Total | Strongly Disagree/Disagree | Strongly Agree/Agree |
|---|---------------------------------------------------------------|-------------------|----------|---------|-------|----------------|---------|-------|----------------------------|----------------------|
| 1 | Patients currently using inhaled cannabis                     | 0.0%              | 23.5%    | 11.8%   | 47.1% | 17.7%          | 0.0%    | 17    | 23.5%                      | 64.7%                |
| 2 | Patients refusing to use oral cannabis extract                | 11.8%             | 23.5%    | 11.8%   | 47.1% | 5.9%           | 0.0%    | 17    | 35.3%                      | 52.9%                |
| 3 | In countries where cannabis extracts are not available        | 0.0%              | 0.0%     | 11.8%   | 52.9% | 35.3%          | 0.0%    | 17    | 0.0%                       | 88.2%                |
| 4 | I prefer inhaled cannabis for chronic pain patients           | 41.2%             | 29.4%    | 17.7%   | 11.8% | 0.0%           | 0.0%    | 17    | 70.6%                      | 11.8%                |
| 5 | I do not recommend inhaled cannabis for chronic pain patients | 17.7%             | 41.2%    | 0.0%    | 17.7% | 17.7%          | 5.9%    | 17    | 58.8%                      | 35.3%                |

**The recommended starting THC:CBD ratio for patients with chronic pain for inhaled use:**



| # | Question           | Strongly Disagree | Disagree | Neutral | Agree | Strongly agree | Abstain | Total | Strongly Disagree/Disagree | Strongly Agree/Agree |
|---|--------------------|-------------------|----------|---------|-------|----------------|---------|-------|----------------------------|----------------------|
| 1 | 1 CBD predominant  | 18.8%             | 12.5%    | 18.8%   | 31.3% | 12.5%          | 6.3%    | 16    | 31.3%                      | 43.8%                |
|   | 2 Balanced THC:CBD | 0.0%              | 11.8%    | 23.5%   | 35.3% | 23.5%          | 5.9%    | 17    | 11.8%                      | 58.8%                |
|   | 3 THC predominant  | 18.8%             | 25.0%    | 18.8%   | 18.8% | 12.5%          | 6.3%    | 16    | 43.8%                      | 31.3%                |

**The starting dose of medical cannabis for inhaled use:**

| # | Answer                             | %      |
|---|------------------------------------|--------|
| 1 | 1 inhalation                       | 47.1%  |
| 2 | 2 inhalations                      | 29.4%  |
| 3 | 3 inhalations                      | 0.0%   |
| 4 | > 3 inhalations                    | 0.0%   |
| 5 | I don't recommend inhaled cannabis | 11.8%  |
| 6 | Abstain                            | 11.8%  |
|   | Total                              | 100.0% |

**The recommended daily dosing for inhaled cannabis is:**

| # | Answer                             | %      |
|---|------------------------------------|--------|
| 1 | Once daily when required           | 5.9%   |
| 2 | Twice daily when required          | 11.8%  |
| 3 | Three times daily when required    | 5.9%   |
| 4 | Four times daily when required     | 17.7%  |
| 5 | Every 4 hours when required        | 29.4%  |
| 6 | Every 2 hours when required        | 5.9%   |
| 7 | I don't recommend inhaled cannabis | 11.8%  |
| 8 | Abstain                            | 11.8%  |
|   | Total                              | 100.0% |

**The recommended up-titration amount for medical cannabis for inhaled use is:**

| # | Answer                             | %      |
|---|------------------------------------|--------|
| 1 | 1 inhalation                       | 58.8%  |
| 2 | 2 inhalations                      | 11.8%  |
| 3 | 3 inhalations                      | 0.0%   |
| 4 | > 3 inhalations                    | 0.0%   |
| 5 | I don't recommend inhaled cannabis | 17.7%  |
| 6 | Abstain                            | 11.8%  |
|   | Total                              | 100.0% |

**The recommended dosing and administration considerations for treating breakthrough pain with medical cannabis are:**

| # | Question                                                                                                   | Strongly Disagree | Disagree | Neutral | Agree | Strongly agree | Abstain | Total | Strongly Disagree/Disagree | Strongly Agree/Agree |
|---|------------------------------------------------------------------------------------------------------------|-------------------|----------|---------|-------|----------------|---------|-------|----------------------------|----------------------|
| 1 | 1 Clinicians should increase the dose of the same cannabis product to manage breakthrough pain             | 0.0%              | 17.7%    | 29.4%   | 41.2% | 5.9%           | 5.9%    | 17    | 17.7%                      | 47.1%                |
|   | 2 Clinicians should increase the frequency of use of the same cannabis product to manage breakthrough pain | 0.0%              | 0.0%     | 11.8%   | 76.5% | 5.9%           | 5.9%    | 17    | 0.0%                       | 82.4%                |
|   | 3 Clinicians should increase the THC dose to manage the patient's breakthrough pain                        | 0.0%              | 11.8%    | 35.3%   | 41.2% | 5.9%           | 5.9%    | 17    | 11.8%                      | 47.1%                |
|   | 4 Clinicians should add as needed oral cannabis to manage breakthrough pain                                | 0.0%              | 35.3%    | 17.7%   | 35.3% | 5.9%           | 5.9%    | 17    | 35.3%                      | 41.2%                |
|   | 5 Clinicians should increase the CBD dose to manage the patient's breakthrough pain                        | 5.9%              | 35.3%    | 29.4%   | 23.5% | 0.0%           | 5.9%    | 17    | 41.2%                      | 23.5%                |
|   | 6 Clinicians should add as needed inhaled cannabis to manage breakthrough pain                             | 0.0%              | 5.9%     | 0.0%    | 58.8% | 23.5%          | 11.8%   | 17    | 5.9%                       | 82.4%                |
|   | 7 Cannabis should not be used for breakthrough pain or distress                                            | 52.9%             | 29.4%    | 0.0%    | 5.9%  | 5.9%           | 5.9%    | 17    | 82.4%                      | 11.8%                |

**The preferred administration format(s) when using medical cannabis for breakthrough pain treatment is:**

| # | Question                                      | Strongly Disagree | Disagree | Neutral | Agree | Strongly agree | Abstain | Total | Strongly Disagree/Disagree | Strongly Agree/Agree |
|---|-----------------------------------------------|-------------------|----------|---------|-------|----------------|---------|-------|----------------------------|----------------------|
| 1 | 1 Inhaled smoked                              | 50.0%             | 18.8%    | 6.3%    | 12.5% | 6.3%           | 6.3%    | 16    | 68.8%                      | 18.8%                |
|   | 2 Inhaled vaporized (dried flower)            | 5.9%              | 5.9%     | 0.0%    | 35.3% | 41.2%          | 11.8%   | 17    | 11.8%                      | 76.5%                |
|   | 3 Inhaled vaporized (prefilled vaporizer pen) | 5.9%              | 23.5%    | 0.0%    | 29.4% | 35.3%          | 5.9%    | 17    | 29.4%                      | 64.7%                |
|   | 4 Mucosal spray                               | 0.0%              | 11.8%    | 23.5%   | 47.1% | 11.8%          | 5.9%    | 17    | 11.8%                      | 58.8%                |
|   | 5 Oral oil                                    | 0.0%              | 41.2%    | 23.5%   | 23.5% | 5.9%           | 5.9%    | 17    | 41.2%                      | 29.4%                |
|   | 6 Oral soft gels/capsule                      | 5.9%              | 52.9%    | 17.7%   | 11.8% | 5.9%           | 5.9%    | 17    | 58.8%                      | 17.6%                |

|   |                                                                                      |       |       |      |       |      |       |    |       |       |
|---|--------------------------------------------------------------------------------------|-------|-------|------|-------|------|-------|----|-------|-------|
| 7 | No additional product but adjustment of the patient's current cannabis THC:CBD ratio | 11.8% | 41.2% | 5.9% | 29.4% | 0.0% | 11.8% | 17 | 52.9% | 29.4% |
|---|--------------------------------------------------------------------------------------|-------|-------|------|-------|------|-------|----|-------|-------|

**The starting THC:CBD ratio for treating breakthrough pain in patients with chronic pain is:**

| # | Question                                                                             | Strongly Disagree | Disagree | Neutral | Agree | Strongly agree | Abstain | Total | Strongly Disagree/Disagree | Strongly Agree/Agree |
|---|--------------------------------------------------------------------------------------|-------------------|----------|---------|-------|----------------|---------|-------|----------------------------|----------------------|
| 1 | CBD predominant                                                                      | 17.7%             | 41.2%    | 23.5%   | 5.9%  | 5.9%           | 5.9%    | 17    | 58.8%                      | 11.8%                |
| 2 | Balanced THC:CBD                                                                     | 0.0%              | 5.9%     | 5.9%    | 64.7% | 17.7%          | 5.9%    | 17    | 5.9%                       | 82.4%                |
| 3 | THC predominant                                                                      | 0.0%              | 17.7%    | 23.5%   | 29.4% | 23.5%          | 5.9%    | 17    | 17.7%                      | 52.9%                |
| 4 | No additional product but adjustment of the patient's current cannabis THC:CBD ratio | 23.5%             | 35.3%    | 5.9%    | 11.8% | 5.9%           | 17.7%   | 17    | 58.8%                      | 17.6%                |

**The monitoring frequency of a patient who is STARTING on medical cannabis is:**

| # | Question                         | Strongly Disagree | Disagree | Neutral | Agree | Strongly agree | Abstain | Total | Strongly Disagree/Disagree | Strongly Agree/Agree |
|---|----------------------------------|-------------------|----------|---------|-------|----------------|---------|-------|----------------------------|----------------------|
| 1 | More frequently than once weekly | 12.5%             | 50.0%    | 12.5%   | 18.8% | 6.3%           | 0.0%    | 16    | 62.5%                      | 25.0%                |
| 2 | Once weekly                      | 6.3%              | 37.5%    | 12.5%   | 25.0% | 18.8%          | 0.0%    | 16    | 43.8%                      | 43.8%                |
| 3 | Twice monthly                    | 0.0%              | 29.4%    | 11.8%   | 35.3% | 17.7%          | 5.9%    | 17    | 29.4%                      | 52.9%                |
| 4 | Once monthly                     | 11.8%             | 11.8%    | 11.8%   | 35.3% | 23.5%          | 5.9%    | 17    | 23.5%                      | 58.8%                |
| 5 | Once every 2 months              | 37.5%             | 31.3%    | 6.3%    | 18.8% | 0.0%           | 6.3%    | 16    | 68.8%                      | 18.8%                |
| 6 | > 2 months                       | 73.3%             | 13.3%    | 6.7%    | 0.0%  | 0.0%           | 6.7%    | 15    | 86.7%                      | 0.0%                 |

**The monitoring frequency of a patient who is STABLE on medical cannabis is:**

| # | Question                           | Strongly Disagree | Disagree | Neutral | Agree | Strongly agree | Abstain | Total | Strongly Disagree/Disagree | Strongly Agree/Agree |
|---|------------------------------------|-------------------|----------|---------|-------|----------------|---------|-------|----------------------------|----------------------|
| 1 | More frequently than once monthly  | 50.0%             | 25.0%    | 18.8%   | 6.3%  | 0.0%           | 0.0%    | 16    | 75.0%                      | 6.3%                 |
| 2 | Monthly                            | 18.8%             | 12.5%    | 18.8%   | 31.3% | 12.5%          | 6.3%    | 16    | 31.3%                      | 43.8%                |
| 3 | Every 3 months                     | 0.0%              | 18.8%    | 0.0%    | 43.8% | 31.3%          | 6.3%    | 16    | 18.8%                      | 75.0%                |
| 4 | Every 6 months                     | 6.3%              | 31.3%    | 18.8%   | 25.0% | 12.5%          | 6.3%    | 16    | 37.5%                      | 37.5%                |
| 5 | > 6 months                         | 31.3%             | 31.3%    | 12.5%   | 18.8% | 0.0%           | 6.3%    | 16    | 62.5%                      | 18.8%                |
| 6 | Routine monitoring is not required | 62.5%             | 31.3%    | 0.0%    | 0.0%  | 0.0%           | 6.3%    | 16    | 93.8%                      | 0.0%                 |

**Medical cannabis should be stopped when:**

| #  | Question                                                                    | Strongly Disagree | Disagree | Neutral | Agree | Strongly agree | Abstain | Total | Strongly Disagree/Disagree | Strongly Agree/Agree |
|----|-----------------------------------------------------------------------------|-------------------|----------|---------|-------|----------------|---------|-------|----------------------------|----------------------|
| 1  | The patient has reached a > 30% reduction in pain intensity                 | 35.3%             | 35.3%    | 11.8%   | 17.7% | 0.0%           | 0.0%    | 17    | 70.6%                      | 17.7%                |
| 2  | The patient has reached an improvement in function                          | 35.3%             | 35.3%    | 5.9%    | 17.7% | 5.9%           | 0.0%    | 17    | 70.6%                      | 23.5%                |
| 3  | The patient experiences mild cannabis-related adverse effects               | 5.9%              | 64.7%    | 17.7%   | 11.8% | 0.0%           | 0.0%    | 17    | 70.6%                      | 11.8%                |
| 4  | The patient experiences moderate or severe cannabis-related adverse effects | 0.0%              | 0.0%     | 5.9%    | 52.9% | 41.2%          | 0.0%    | 17    | 0.0%                       | 94.1%                |
| 5  | The medical cannabis is not providing pain relief after a dose increase     | 5.9%              | 29.4%    | 41.2%   | 17.7% | 5.9%           | 0.0%    | 17    | 35.3%                      | 23.5%                |
| 6  | When the maximum agreed upon dose in mg is reached and not benefit          | 0.0%              | 5.9%     | 11.8%   | 52.9% | 29.4%          | 0.0%    | 17    | 5.9%                       | 82.4%                |
| 7  | If a patient experiences loss of efficacy after a dosage increase           | 5.9%              | 35.3%    | 29.4%   | 17.7% | 11.8%          | 0.0%    | 17    | 41.2%                      | 29.4%                |
| 8  | If the patient is not responded on two trials of cannabis varieties         | 11.8%             | 41.2%    | 29.4%   | 11.8% | 5.9%           | 0.0%    | 17    | 52.9%                      | 17.6%                |
| 9  | If the patient has misuse or diversion                                      | 0.0%              | 5.9%     | 11.8%   | 29.4% | 47.1%          | 5.9%    | 17    | 5.9%                       | 76.5%                |
| 10 | If the patient has legal troubles or motor vehicle accidents                | 0.0%              | 5.9%     | 35.3%   | 11.8% | 41.2%          | 5.9%    | 17    | 5.9%                       | 52.9%                |

**CBD is associated with the following adverse effects:**

| # | Question               | Strongly Disagree | Disagree | Neutral | Agree | Strongly agree | Abstain | Total | Strongly Disagree/Disagree | Strongly Agree/Agree |
|---|------------------------|-------------------|----------|---------|-------|----------------|---------|-------|----------------------------|----------------------|
| 1 | Anxiety                | 17.7%             | 47.1%    | 17.7%   | 11.8% | 0.0%           | 5.9%    | 17    | 64.7%                      | 11.8%                |
| 2 | Dizziness              | 5.9%              | 41.2%    | 5.9%    | 41.2% | 0.0%           | 5.9%    | 17    | 47.1%                      | 41.2%                |
| 3 | Fatigue or somnolence  | 5.9%              | 5.9%     | 11.8%   | 64.7% | 5.9%           | 5.9%    | 17    | 11.8%                      | 70.6%                |
| 4 | Increase risk of falls | 6.3%              | 43.8%    | 18.8%   | 25.0% | 0.0%           | 6.3%    | 16    | 50.0%                      | 25.0%                |
| 5 | Reduced blood pressure | 5.9%              | 52.9%    | 23.5%   | 11.8% | 0.0%           | 5.9%    | 17    | 58.8%                      | 11.8%                |
| 6 | Diarrhea               | 0.0%              | 11.8%    | 29.4%   | 52.9% | 0.0%           | 5.9%    | 17    | 11.8%                      | 52.9%                |
| 7 | Appetite loss          | 5.9%              | 47.1%    | 5.9%    | 35.3% | 0.0%           | 5.9%    | 17    | 52.9%                      | 35.3%                |
| 8 | Acute Psychosis        | 35.3%             | 41.2%    | 5.9%    | 11.8% | 0.0%           | 5.9%    | 17    | 76.5%                      | 11.8%                |
| 9 | Short-term memory loss | 17.7%             | 52.9%    | 11.8%   | 11.8% | 0.0%           | 5.9%    | 17    | 70.6%                      | 11.8%                |

|    |                                         |       |       |       |       |      |      |    |       |       |
|----|-----------------------------------------|-------|-------|-------|-------|------|------|----|-------|-------|
| 10 | Tachycardia                             | 23.5% | 35.3% | 5.9%  | 29.4% | 0.0% | 5.9% | 17 | 58.8% | 29.4% |
| 11 | Nausea and vomiting                     | 11.8% | 35.3% | 11.8% | 29.4% | 5.9% | 5.9% | 17 | 47.1% | 35.3% |
| 12 | Sleep Disturbances                      | 11.8% | 23.5% | 17.7% | 41.2% | 0.0% | 5.9% | 17 | 35.3% | 41.2% |
| 13 | Restlessness                            | 17.7% | 29.4% | 11.8% | 35.3% | 0.0% | 5.9% | 17 | 47.1% | 35.3% |
| 14 | Sensitivity reactions (e.g. rash, itch) | 5.9%  | 47.1% | 17.7% | 23.5% | 0.0% | 5.9% | 17 | 52.9% | 23.5% |

**THC is associated with the following adverse effects:**

| #  | Question                                | Strongly Disagree | Disagree | Neutral | Agree | Strongly agree | Abstain | Total | Strongly Disagree/Disagree | Strongly Agree/Agree |
|----|-----------------------------------------|-------------------|----------|---------|-------|----------------|---------|-------|----------------------------|----------------------|
| 1  | Anxiety                                 | 0.0%              | 0.0%     | 17.7%   | 52.9% | 29.4%          | 0.0%    | 17    | 0.0%                       | 82.4%                |
| 2  | Dizziness                               | 0.0%              | 0.0%     | 0.0%    | 58.8% | 41.2%          | 0.0%    | 17    | 0.0%                       | 100.0%               |
| 3  | Fatigue or somnolence                   | 0.0%              | 0.0%     | 0.0%    | 58.8% | 41.2%          | 0.0%    | 17    | 0.0%                       | 100.0%               |
| 4  | Increase risk of falls                  | 0.0%              | 0.0%     | 11.8%   | 52.9% | 35.3%          | 0.0%    | 17    | 0.0%                       | 88.2%                |
| 5  | Reduced blood pressure                  | 0.0%              | 0.0%     | 17.7%   | 47.1% | 29.4%          | 5.9%    | 17    | 0.0%                       | 76.5%                |
| 6  | Diarrhea                                | 5.9%              | 17.7%    | 29.4%   | 41.2% | 5.9%           | 0.0%    | 17    | 23.5%                      | 47.1%                |
| 7  | Appetite loss                           | 17.7%             | 41.2%    | 11.8%   | 17.7% | 5.9%           | 5.9%    | 17    | 58.8%                      | 23.5%                |
| 8  | Acute Psychosis                         | 5.9%              | 0.0%     | 0.0%    | 58.8% | 35.3%          | 0.0%    | 17    | 5.9%                       | 94.1%                |
| 9  | Short-term memory loss                  | 0.0%              | 0.0%     | 5.9%    | 58.8% | 35.3%          | 0.0%    | 17    | 0.0%                       | 94.1%                |
| 10 | Tachycardia                             | 0.0%              | 0.0%     | 5.9%    | 58.8% | 35.3%          | 0.0%    | 17    | 0.0%                       | 94.1%                |
| 11 | Nausea and vomiting                     | 0.0%              | 5.9%     | 17.7%   | 41.2% | 29.4%          | 5.9%    | 17    | 5.9%                       | 70.6%                |
| 12 | Xerostomia                              | 0.0%              | 11.8%    | 29.4%   | 17.7% | 35.3%          | 5.9%    | 17    | 11.8%                      | 52.9%                |
| 13 | Sensitivity reactions (e.g. rash, itch) | 0.0%              | 23.5%    | 47.1%   | 17.7% | 5.9%           | 5.9%    | 17    | 23.5%                      | 23.5%                |

**Goals for using medical cannabis include:**

| #  | Question                                                    | Strongly Disagree | Disagree | Neutral | Agree | Strongly agree | Abstain | Total | Strongly Disagree/Disagree | Strongly Agree/Agree |
|----|-------------------------------------------------------------|-------------------|----------|---------|-------|----------------|---------|-------|----------------------------|----------------------|
| 1  | Improve overall analgesic efficacy                          | 0.0%              | 0.0%     | 0.0%    | 35.3% | 64.7%          | 0.0%    | 17    | 0.0%                       | 100.0%               |
| 2  | Address breakthrough pain symptoms                          | 0.0%              | 5.9%     | 17.7%   | 47.1% | 29.4%          | 0.0%    | 17    | 5.9%                       | 76.5%                |
| 3  | Address episodic symptoms and exacerbations                 | 0.0%              | 5.9%     | 17.7%   | 41.2% | 35.3%          | 0.0%    | 17    | 5.9%                       | 76.5%                |
| 4  | Improvement in disease specific symptoms and symptom burden | 0.0%              | 0.0%     | 0.0%    | 47.1% | 52.9%          | 0.0%    | 17    | 0.0%                       | 100.0%               |
| 5  | Spare opioids and support opioid tapers                     | 0.0%              | 0.0%     | 0.0%    | 35.3% | 64.7%          | 0.0%    | 17    | 0.0%                       | 100.0%               |
| 6  | Reduce benzodiazepine use                                   | 0.0%              | 0.0%     | 5.9%    | 35.3% | 58.8%          | 0.0%    | 17    | 0.0%                       | 94.1%                |
| 7  | Reduce skeletal muscle relaxant use                         | 0.0%              | 5.9%     | 5.9%    | 58.8% | 29.4%          | 0.0%    | 17    | 5.9%                       | 88.2%                |
| 8  | Reduce hypnotic use                                         | 0.0%              | 0.0%     | 17.7%   | 47.1% | 35.3%          | 0.0%    | 17    | 0.0%                       | 82.4%                |
| 9  | Reduce NSAID use                                            | 0.0%              | 11.8%    | 17.7%   | 52.9% | 17.7%          | 0.0%    | 17    | 11.8%                      | 70.6%                |
| 10 | Reduce antidepressant use                                   | 0.0%              | 29.4%    | 23.5%   | 29.4% | 17.7%          | 0.0%    | 17    | 29.4%                      | 47.1%                |
| 11 | Reduce neuroleptic use                                      | 0.0%              | 11.8%    | 29.4%   | 35.3% | 23.5%          | 0.0%    | 17    | 11.8%                      | 58.8%                |
| 12 | Reduce corticosteroid use                                   | 5.9%              | 17.7%    | 35.3%   | 17.7% | 23.5%          | 0.0%    | 17    | 23.5%                      | 41.2%                |
| 13 | Reduce legal substance use (e.g. alcohol, tobacco)          | 0.0%              | 17.7%    | 23.5%   | 35.3% | 23.5%          | 0.0%    | 17    | 17.7%                      | 58.8%                |
| 14 | Reduce illicit substance use                                | 0.0%              | 11.8%    | 11.8%   | 41.2% | 35.3%          | 0.0%    | 17    | 11.8%                      | 76.5%                |
| 15 | Mitigate opioid-related adverse effects                     | 0.0%              | 0.0%     | 0.0%    | 52.9% | 47.1%          | 0.0%    | 17    | 0.0%                       | 100.0%               |
| 16 | Reduce opioid withdrawal symptom                            | 0.0%              | 5.9%     | 17.7%   | 35.3% | 41.2%          | 0.0%    | 17    | 5.9%                       | 76.5%                |
| 17 | Improve quality of life                                     | 0.0%              | 0.0%     | 0.0%    | 29.4% | 70.6%          | 0.0%    | 17    | 0.0%                       | 100.0%               |
| 18 | Improve function                                            | 0.0%              | 0.0%     | 0.0%    | 17.7% | 82.4%          | 0.0%    | 17    | 0.0%                       | 100.0%               |
| 19 | Improve self-efficacy                                       | 0.0%              | 0.0%     | 0.0%    | 35.3% | 58.8%          | 5.9%    | 17    | 0.0%                       | 94.1%                |
| 20 | Improve sleep                                               | 0.0%              | 0.0%     | 0.0%    | 17.7% | 82.4%          | 0.0%    | 17    | 0.0%                       | 100.0%               |
| 21 | Improve mood                                                | 0.0%              | 0.0%     | 5.9%    | 29.4% | 64.7%          | 0.0%    | 17    | 0.0%                       | 94.1%                |
| 22 | Reduce anhedonia                                            | 0.0%              | 0.0%     | 11.8%   | 52.9% | 35.3%          | 0.0%    | 17    | 0.0%                       | 88.2%                |
| 23 | Reduce anxiety                                              | 0.0%              | 0.0%     | 11.8%   | 47.1% | 41.2%          | 0.0%    | 17    | 0.0%                       | 88.2%                |

**The place in therapy for medical cannabis for Chronic inflammatory pain is:**

| # | Question                                                  | Strongly Disagree | Disagree | Neutral | Agree | Strongly agree | Abstain | Total | Strongly Disagree/Disagree | Strongly Agree/Agree |
|---|-----------------------------------------------------------|-------------------|----------|---------|-------|----------------|---------|-------|----------------------------|----------------------|
| 1 | As a first-line therapy after non-pharmacotherapy options | 29.4%             | 64.7%    | 0.0%    | 5.9%  | 0.0%           | 0.0%    | 17    | 94.1%                      | 5.9%                 |
| 2 | Before acetaminophen (paracetamol) and NSAIDs             | 29.4%             | 58.8%    | 5.9%    | 5.9%  | 0.0%           | 0.0%    | 17    | 88.2%                      | 5.9%                 |
| 3 | Before antidepressants                                    | 5.9%              | 58.8%    | 11.8%   | 5.9%  | 17.7%          | 0.0%    | 17    | 64.7%                      | 23.5%                |
| 4 | Before anti-epileptics                                    | 5.9%              | 52.9%    | 11.8%   | 11.8% | 17.7%          | 0.0%    | 17    | 58.8%                      | 29.4%                |
| 5 | Before opioids                                            | 5.9%              | 29.4%    | 5.9%    | 23.5% | 35.3%          | 0.0%    | 17    | 35.3%                      | 58.8%                |

The place in therapy for medical cannabis for Chronic nociceptive pain with supraspinal sensitisation is:

| # | Question                                                    | Strongly Disagree | Disagree | Neutral | Agree | Strongly agree | Abstain | Total | Strongly Disagree/Disagree | Strongly Agree/Agree |
|---|-------------------------------------------------------------|-------------------|----------|---------|-------|----------------|---------|-------|----------------------------|----------------------|
| 1 | 1 As a first-line therapy after non-pharmacotherapy options | 17.7%             | 58.8%    | 5.9%    | 5.9%  | 11.8%          | 0.0%    | 17    | 76.5%                      | 17.6%                |
|   | 2 Before acetaminophen (paracetamol) and NSAIDs             | 23.5%             | 47.1%    | 17.7%   | 0.0%  | 11.8%          | 0.0%    | 17    | 70.6%                      | 11.8%                |
|   | 3 Before antidepressants                                    | 0.0%              | 58.8%    | 23.5%   | 11.8% | 5.9%           | 0.0%    | 17    | 58.8%                      | 17.6%                |
|   | 4 Before anti-epileptics                                    | 0.0%              | 41.2%    | 35.3%   | 17.7% | 5.9%           | 0.0%    | 17    | 41.2%                      | 23.5%                |
|   | 5 Before opioids                                            | 5.9%              | 11.8%    | 5.9%    | 41.2% | 35.3%          | 0.0%    | 17    | 17.6%                      | 76.5%                |

The place in therapy for medical cannabis for Chronic nociceptive pain without supraspinal sensitisation is:

| # | Question                                                    | Strongly Disagree | Disagree | Neutral | Agree | Strongly agree | Abstain | Total | Strongly Disagree/Disagree | Strongly Agree/Agree |
|---|-------------------------------------------------------------|-------------------|----------|---------|-------|----------------|---------|-------|----------------------------|----------------------|
| 1 | 1 As a first-line therapy after non-pharmacotherapy options | 41.2%             | 52.9%    | 0.0%    | 0.0%  | 5.9%           | 0.0%    | 17    | 94.1%                      | 5.9%                 |
|   | 2 Before acetaminophen (paracetamol) and NSAIDs             | 29.4%             | 58.8%    | 5.9%    | 0.0%  | 5.9%           | 0.0%    | 17    | 88.2%                      | 5.9%                 |
|   | 3 Before antidepressants                                    | 11.8%             | 52.9%    | 23.5%   | 5.9%  | 5.9%           | 0.0%    | 17    | 64.7%                      | 11.8%                |
|   | 4 Before anti-epileptics                                    | 11.8%             | 47.1%    | 23.5%   | 11.8% | 5.9%           | 0.0%    | 17    | 58.8%                      | 17.6%                |
|   | 5 Before opioids                                            | 5.9%              | 23.5%    | 5.9%    | 29.4% | 35.3%          | 0.0%    | 17    | 29.4%                      | 64.7%                |

The place in therapy for medical cannabis for Chronic neuropathic pain is:

| # | Question                                                    | Strongly Disagree | Disagree | Neutral | Agree | Strongly agree | Abstain | Total | Strongly Disagree/Disagree | Strongly Agree/Agree |
|---|-------------------------------------------------------------|-------------------|----------|---------|-------|----------------|---------|-------|----------------------------|----------------------|
| 1 | 1 As a first-line therapy after non-pharmacotherapy options | 11.8%             | 64.7%    | 11.8%   | 0.0%  | 11.8%          | 0.0%    | 17    | 76.5%                      | 11.8%                |
|   | 2 Before acetaminophen (paracetamol) and NSAIDs             | 23.5%             | 23.5%    | 17.7%   | 23.5% | 11.8%          | 0.0%    | 17    | 47.1%                      | 35.3%                |
|   | 3 Before antidepressants                                    | 5.9%              | 52.9%    | 17.7%   | 17.7% | 5.9%           | 0.0%    | 17    | 58.8%                      | 23.5%                |
|   | 4 Before anti-epileptics                                    | 5.9%              | 47.1%    | 23.5%   | 17.7% | 5.9%           | 0.0%    | 17    | 52.9%                      | 23.5%                |
|   | 5 Before opioids                                            | 0.0%              | 17.7%    | 0.0%    | 35.3% | 47.1%          | 0.0%    | 17    | 17.7%                      | 82.4%                |

The place in therapy for medical cannabis for Chronic visceral pain is:

| # | Question                                                    | Strongly Disagree | Disagree | Neutral | Agree | Strongly agree | Abstain | Total | Strongly Disagree/Disagree | Strongly Agree/Agree |
|---|-------------------------------------------------------------|-------------------|----------|---------|-------|----------------|---------|-------|----------------------------|----------------------|
| 1 | 1 As a first-line therapy after non-pharmacotherapy options | 23.5%             | 52.9%    | 11.8%   | 0.0%  | 11.8%          | 0.0%    | 17    | 76.5%                      | 11.8%                |
|   | 2 Before acetaminophen (paracetamol) and NSAIDs             | 11.8%             | 41.2%    | 17.7%   | 17.7% | 11.8%          | 0.0%    | 17    | 52.9%                      | 29.4%                |
|   | 3 Before antidepressants                                    | 5.9%              | 47.1%    | 17.7%   | 17.7% | 11.8%          | 0.0%    | 17    | 52.9%                      | 29.4%                |
|   | 4 Before anti-epileptics                                    | 5.9%              | 35.3%    | 23.5%   | 23.5% | 11.8%          | 0.0%    | 17    | 41.2%                      | 35.3%                |
|   | 5 Before opioids                                            | 0.0%              | 17.7%    | 5.9%    | 35.3% | 41.2%          | 0.0%    | 17    | 17.7%                      | 76.5%                |

The place in therapy for medical cannabis for Chronic traumatic pain is:

| # | Question                                                    | Strongly Disagree | Disagree | Neutral | Agree | Strongly agree | Abstain | Total | Strongly Disagree/Disagree | Strongly Agree/Agree |
|---|-------------------------------------------------------------|-------------------|----------|---------|-------|----------------|---------|-------|----------------------------|----------------------|
| 1 | 1 As a first-line therapy after non-pharmacotherapy options | 23.5%             | 58.8%    | 5.9%    | 0.0%  | 5.9%           | 5.9%    | 17    | 82.4%                      | 5.9%                 |
|   | 2 Before acetaminophen (paracetamol) and NSAIDs             | 11.8%             | 64.7%    | 11.8%   | 0.0%  | 5.9%           | 5.9%    | 17    | 76.5%                      | 5.9%                 |
|   | 3 Before antidepressants                                    | 5.9%              | 47.1%    | 23.5%   | 11.8% | 5.9%           | 5.9%    | 17    | 52.9%                      | 17.6%                |
|   | 4 Before anti-epileptics                                    | 5.9%              | 35.3%    | 35.3%   | 5.9%  | 11.8%          | 5.9%    | 17    | 41.2%                      | 17.6%                |
|   | 5 Before opioids                                            | 5.9%              | 17.7%    | 5.9%    | 29.4% | 35.3%          | 5.9%    | 17    | 23.5%                      | 64.7%                |

The place in therapy for medical cannabis for Chronic cancer pain is:

| # | Question                                                    | Strongly Disagree | Disagree | Neutral | Agree | Strongly agree | Abstain | Total | Strongly Disagree/Disagree | Strongly Agree/Agree |
|---|-------------------------------------------------------------|-------------------|----------|---------|-------|----------------|---------|-------|----------------------------|----------------------|
| 1 | 1 As a first-line therapy after non-pharmacotherapy options | 23.5%             | 47.1%    | 5.9%    | 5.9%  | 11.8%          | 5.9%    | 17    | 70.6%                      | 17.6%                |
|   | 2 Before acetaminophen (paracetamol) and NSAIDs             | 23.5%             | 41.2%    | 11.8%   | 5.9%  | 11.8%          | 5.9%    | 17    | 64.7%                      | 17.6%                |
|   | 3 Before antidepressants                                    | 5.9%              | 35.3%    | 17.7%   | 23.5% | 11.8%          | 5.9%    | 17    | 41.2%                      | 35.3%                |
|   | 4 Before anti-epileptics                                    | 5.9%              | 29.4%    | 23.5%   | 23.5% | 11.8%          | 5.9%    | 17    | 35.3%                      | 35.3%                |
|   | 5 Before opioids                                            | 6.3%              | 25.0%    | 12.5%   | 31.3% | 18.8%          | 6.3%    | 16    | 31.3%                      | 50.0%                |

The place in therapy for medical cannabis for Palliative pain is:

| # | Question                                                  | Strongly Disagree | Disagree | Neutral | Agree | Strongly agree | Abstain | Total | Strongly Disagree/Disagree | Strongly Agree/Agree |
|---|-----------------------------------------------------------|-------------------|----------|---------|-------|----------------|---------|-------|----------------------------|----------------------|
| 1 | As a first-line therapy after non-pharmacotherapy options | 23.5%             | 35.3%    | 5.9%    | 17.7% | 17.7%          | 0.0%    | 17    | 58.8%                      | 35.3%                |
| 2 | Before acetaminophen (paracetamol) and NSAIDs             | 23.5%             | 29.4%    | 11.8%   | 17.7% | 17.7%          | 0.0%    | 17    | 52.9%                      | 35.3%                |
| 3 | Before antidepressants                                    | 11.8%             | 29.4%    | 17.7%   | 23.5% | 17.7%          | 0.0%    | 17    | 41.2%                      | 41.2%                |
| 4 | Before anti-epileptics                                    | 11.8%             | 23.5%    | 17.7%   | 29.4% | 17.7%          | 0.0%    | 17    | 35.3%                      | 47.1%                |
| 5 | Before opioids                                            | 11.8%             | 17.7%    | 23.5%   | 29.4% | 17.7%          | 0.0%    | 17    | 29.4%                      | 47.1%                |
