# Supplementary material
Source: PubMed Central journal article supplement (PMC8254373)
Supplement: 42238_2021_73_MOESM3_ESM.pdf [file 42238_2021_73_MOESM3_ESM.pdf]

## Consensus Voting Round 2 Results

Consensus Reached with ≥75%  
n=17

### Rationale for using medical cannabis in patients with chronic pain, include:

| # | Question                            | Strongly Disagree | Disagree | Neutral | Agree | Strongly agree | Abstain | Total | Strongly Disagree/ Disagree | Strongly Agree/ Agree |
|---|-------------------------------------|-------------------|----------|---------|-------|----------------|---------|-------|-----------------------------|-----------------------|
| 1 | Reduction in anti-depressant use    | 0%                | 35%      | 0%      | 47%   | 18%            | 0%      | 17    | 35%                         | 65%                   |
| 2 | Reduction in anti-epileptic use     | 0%                | 29%      | 12%     | 35%   | 24%            | 0%      | 17    | 29%                         | 59%                   |
| 3 | Patient preference for cannabis use | 6%                | 12%      | 18%     | 53%   | 12%            | 0%      | 17    | 18%                         | 65%                   |

### Medical cannabis is likely effective for

| # | Question                   | Strongly Disagree | Disagree | Neutral | Agree | Strongly agree | Abstain | Total | Strongly Disagree/ Disagree | Strongly Agree/ Agree |
|---|----------------------------|-------------------|----------|---------|-------|----------------|---------|-------|-----------------------------|-----------------------|
| 1 | Mixed pain                 | 0%                | 0%       | 6%      | 82%   | 12%            | 0%      | 17    | 0%                          | 94%                   |
| 2 | Neuropathic pain           | 0%                | 0%       | 0%      | 35%   | 65%            | 0%      | 17    | 0%                          | 100%                  |
| 3 | Inflammatory pain          | 0%                | 0%       | 12%     | 82%   | 6%             | 0%      | 17    | 0%                          | 88%                   |
| 4 | Nociplastic pain           | 0%                | 0%       | 18%     | 65%   | 12%            | 6%      | 17    | 0%                          | 77%                   |
| 5 | Chronic headache/migraines | 0%                | 0%       | 41%     | 47%   | 12%            | 0%      | 17    | 0%                          | 59%                   |

### The minimum age for use of CBD in patients with chronic pain is:

| # | Answer          | %   |
|---|-----------------|-----|
| 1 | 25 years of age | 6%  |
| 2 | 21 years of age | 6%  |
| 3 | 18 years of age | 12% |
| 4 | No minimum age  | 76% |
| 5 | Total           | 17  |

### Medical cannabis should be avoided in patients with chronic pain with the following conditions:

| # | Question                                                                                                        | Strongly Disagree | Disagree | Neutral | Agree | Strongly agree | Abstain | Total | Strongly Disagree/ Disagree | Strongly Agree/ Agree |
|---|-----------------------------------------------------------------------------------------------------------------|-------------------|----------|---------|-------|----------------|---------|-------|-----------------------------|-----------------------|
| 1 | A patient with mood disorder                                                                                    | 18%               | 53%      | 24%     | 6%    | 0%             | 0%      | 17    | 71%                         | 6%                    |
| 2 | A patient who is taking high doses benzodiazepines or other sedating medications prescribed or over the counter | 12%               | 53%      | 12%     | 24%   | 0%             | 0%      | 17    | 65%                         | 24%                   |
| 3 | A patient with stable cardiovascular disease                                                                    | 12%               | 82%      | 6%      | 0%    | 0%             | 0%      | 17    | 94%                         | 0%                    |
| 4 | A patient with unstable cardiovascular disease                                                                  | 0%                | 18%      | 18%     | 47%   | 18%            | 0%      | 17    | 18%                         | 65%                   |
| 5 | A patient with severe renal disease                                                                             | 18%               | 47%      | 24%     | 12%   | 0%             | 0%      | 17    | 65%                         | 12%                   |
| 6 | A patient with immunosuppression                                                                                | 29%               | 35%      | 29%     | 0%    | 0%             | 6%      | 17    | 64%                         | 0%                    |

### Medical cannabis should be avoided in patients with chronic pain being administered the following medications:

| # | Question                                                       | Strongly Disagree | Disagree | Neutral | Agree | Strongly agree | Abstain | Total | Strongly Disagree/ Disagree | Strongly Agree/ Agree |
|---|----------------------------------------------------------------|-------------------|----------|---------|-------|----------------|---------|-------|-----------------------------|-----------------------|
| 1 | Warfarin                                                       | 12%               | 53%      | 12%     | 24%   | 0%             | 0%      | 17    | 65%                         | 24%                   |
| 2 | Direct oral anticoagulants (DOACs)                             | 12%               | 53%      | 18%     | 12%   | 8%             | 0%      | 17    | 65%                         | 18%                   |
| 3 | Anti-psychotics                                                | 18%               | 41%      | 18%     | 24%   | 0%             | 0%      | 17    | 59%                         | 24%                   |
| 4 | Immunotherapy agents for oncology (e.g. checkpoint inhibitors) | 24%               | 24%      | 24%     | 24%   | 6%             | 0%      | 17    | 48%                         | 30%                   |

### The initiating THC:CBD ratio for patients with chronic pain requiring routine dosing and titration should be:

| # | Question                                                          | Strongly Disagree | Disagree | Neutral | Agree | Strongly agree | Abstain | Total | Strongly Disagree/ Disagree | Strongly Agree/ Agree |
|---|-------------------------------------------------------------------|-------------------|----------|---------|-------|----------------|---------|-------|-----------------------------|-----------------------|
| 1 | CBD predominant                                                   | 6%                | 12%      | 12%     | 29%   | 41%            | 0%      | 17    | 18%                         | 70%                   |
| 2 | CBD predominant during the day and add THC predominant at bedtime | 6%                | 24%      | 24%     | 35%   | 12%            | 0%      | 17    | 30%                         | 47%                   |
| 3 | Balanced THC:CBD                                                  | 0%                | 24%      | 12%     | 47%   | 18%            | 0%      | 17    | 24%                         | 65%                   |
| 4 | THC predominant                                                   | 24%               | 41%      | 6%      | 24%   | 6%             | 0%      | 17    | 65%                         | 30%                   |

### The initiating CBD daily dose for routine dosing and titration is: (total amount in 24 hours)

| # | Answer  | %   |
|---|---------|-----|
| 1 | 5 mg    | 12% |
| 2 | 10 mg   | 71% |
| 3 | 20 mg   | 6%  |
| 4 | 50 mg   | 12% |
| 5 | > 50 mg | 0%  |
| 6 | Total   | 17  |

### For the routine arm, the recommended initiating dosing frequency for CBD is: (Daily dose divided into this frequency)

| # | Answer      | %   |
|---|-------------|-----|
| 1 | Once daily  | 24% |
| 2 | Twice daily | 76% |
| 3 | Total       | 17  |

### The recommended CBD titration amount for routine dosing and titration is:

| # | Answer | %   |
|---|--------|-----|
| 1 | 5 mg   | 29% |
| 2 | 10 mg  | 47% |
| 3 | 20 mg  | 24% |
| 4 | Total  | 17  |

### The recommended CBD up-titration frequency for routine dosing and administration is:

| # | Answer          | %   |
|---|-----------------|-----|
| 1 | Daily           | 13% |
| 2 | Every other day | 31% |
| 3 | Once a week     | 56% |
| 4 | Total           | 16  |

### For routine dosing and titration, after initiating with a CBD predominant variety and target symptom relief has not been obtained, THC should be introduced:

| # | Question                                                                 | Strongly Disagree | Disagree | Neutral | Agree | Strongly agree | Abstain | Total | Strongly Disagree/ Disagree | Strongly Agree/ Agree |
|---|--------------------------------------------------------------------------|-------------------|----------|---------|-------|----------------|---------|-------|-----------------------------|-----------------------|
| 1 | At bedtime once patient is taking ≥ 20mg of CBD                          | 12%               | 12%      | 18%     | 47%   | 24%            | 6%      | 17    | 24%                         | 30%                   |
| 2 | At bedtime once patient is taking > 40mg of CBD                          | 12%               | 12%      | 18%     | 35%   | 24%            | 0%      | 17    | 24%                         | 59%                   |
| 3 | At bedtime when the patient is on maximally tolerated CBD dose           | 0%                | 24%      | 24%     | 24%   | 29%            | 0%      | 17    | 24%                         | 53%                   |
| 4 | At bedtime when the patient is on maximal affordable CBD dose            | 0%                | 18%      | 18%     | 35%   | 24%            | 6%      | 17    | 18%                         | 59%                   |
| 5 | I do not recommend initiating with CBD predominant before initiating THC | 24%               | 29%      | 12%     | 12%   | 18%            | 6%      | 17    | 53%                         | 30%                   |

### The recommended initiating THC daily dose for routine dosing and titration is: (amount for 24 hours)

| # | Answer | %   |
|---|--------|-----|
| 1 | 1 mg   | 13% |
| 2 | 2.5 mg | 88% |
| 3 | Total  | 16  |

### The recommended THC titration amount for routine dosing and titration is:

| # | Answer | %   |
|---|--------|-----|
| 1 | 1 mg   | 12% |
| 2 | 2.5 mg | 88% |
| 3 | Total  | 17  |

### The recommended THC up-titration frequency for routine dosing and titration is:

| # | Answer          | %   |
|---|-----------------|-----|
| 1 | Daily           | 0%  |
| 2 | Every other day | 47% |
| 3 | Once a week     | 41% |

|   |               |    |
|---|---------------|----|
| 4 | Every 2 weeks | 6% |
| 5 | Abstain       | 6% |
| 6 | Total         | 17 |

The recommended maximum daily dose of CBD for routine dosing and titration is:

| # | Answer                | %   |
|---|-----------------------|-----|
| 1 | 50 mg                 | 0%  |
| 2 | 100 mg                | 29% |
| 3 | 300 mg                | 29% |
| 4 | 600 mg                | 0%  |
| 5 | No maximum daily dose | 41% |
| 6 | Abstain               | 0%  |
| 6 | Total                 | 17  |

The recommended maximum daily dose of THC for routine dosing and titration is:

| # | Answer                | %   |
|---|-----------------------|-----|
| 1 | 10 mg                 | 0%  |
| 2 | 20 mg                 | 29% |
| 3 | 40 mg                 | 47% |
| 4 | 80 mg                 | 6%  |
| 5 | No maximum daily dose | 18% |
| 6 | Total                 | 17  |

The patients and conditions that should be considered for rapid medical cannabis dosing and titration are:

| # | Question                                                                              | Strongly Disagree | Disagree | Neutral | Agree | Strongly agree | Abstain | Total | Strongly Disagree/ Disagree | Strongly Agree/ Agree |
|---|---------------------------------------------------------------------------------------|-------------------|----------|---------|-------|----------------|---------|-------|-----------------------------|-----------------------|
| 1 | The patient is taking > 90 mg morphine equivalent dose (MED)                          | 6%                | 18%      | 29%     | 35%   | 12%            | 0%      | 17    | 24%                         | 47%                   |
| 2 | The patient who is currently using opioids, gabapentinoids or SNRIs                   | 0%                | 41%      | 41%     | 12%   | 6%             | 0%      | 17    | 41%                         | 18%                   |
| 3 | The patient who has been unsuccessfully treated with opioids, gabapentinoids or SNRIs | 0%                | 29%      | 29%     | 35%   | 6%             | 0%      | 17    | 29%                         | 41%                   |
| 4 | The patient is experiencing primarily neuropathic pain                                | 0%                | 29%      | 24%     | 41%   | 6%             | 0%      | 17    | 29%                         | 47%                   |
| 5 | Lack of efficacy at low/moderate cannabis doses                                       | 0%                | 24%      | 29%     | 24%   | 24%            | 0%      | 17    | 24%                         | 48%                   |

The recommended initiating THC:CBD ratio for rapid dosing and titration is:

| # | Question                                                  | Strongly Disagree | Disagree | Neutral | Agree | Strongly agree | Abstain | Total | Strongly Disagree/ Disagree | Strongly Agree/ Agree |
|---|-----------------------------------------------------------|-------------------|----------|---------|-------|----------------|---------|-------|-----------------------------|-----------------------|
| 1 | CBD predominant in the day and THC predominant at bedtime | 0%                | 18%      | 41%     | 35%   | 6%             | 0%      | 17    | 18%                         | 41%                   |
| 2 | Balanced THC:CBD                                          | 0%                | 0%       | 12%     | 59%   | 29%            | 0%      | 17    | 0%                          | 88%                   |
| 3 | THC predominant                                           | 6%                | 24%      | 35%     | 29%   | 6%             | 0%      | 17    | 30%                         | 35%                   |

The recommended initiating THC daily dose for rapid dosing and titration is: (amount for 24 hours)

| # | Answer  | %   |
|---|---------|-----|
| 1 | 2.5 mg  | 35% |
| 2 | 5 mg    | 53% |
| 3 | 10 mg   | 12% |
| 4 | Abstain | 0%  |
| 5 | Total   | 17  |

The recommended initiating dosing frequency of THC for rapid dosing and titration is: (Daily dose divided into this frequency)

| # | Answer            | %   |
|---|-------------------|-----|
| 1 | Once daily        | 35% |
| 2 | Twice daily       | 53% |
| 3 | Three times daily | 12% |
| 4 | Abstain           | 0%  |
| 5 | Total             | 17  |

The recommended THC titration amount for rapid dosing and titration is:

| # | Answer  | %   |
|---|---------|-----|
| 1 | 1 mg    | 6%  |
| 2 | 5 mg    | 29% |
| 3 | 10 mg   | 0%  |
| 4 | 2.5 mg  | 65% |
| 5 | Abstain | 0%  |
| 6 | Total   | 17  |

The recommended THC up-titration frequency for rapid dosing and titration is:

| # | Answer          | %   |
|---|-----------------|-----|
| 1 | Daily           | 12% |
| 2 | Every other day | 82% |
| 3 | Once a week     | 6%  |
| 4 | Abstain         | 0%  |
| 5 | Total           | 17  |

The recommended maximum daily dose of THC for rapid dosing and titration is:

| # | Answer                | %   |
|---|-----------------------|-----|
| 1 | 20 mg                 | 6%  |
| 2 | 40 mg                 | 65% |
| 3 | 80 mg                 | 18% |
| 4 | No maximum daily dose | 12% |
| 5 | Abstain               | 0%  |
| 6 | Total                 | 17  |

The recommended initiating CBD daily dose for rapid dosing and titration is: (total amount in 24 hours)

| # | Answer                                 | %   |
|---|----------------------------------------|-----|
| 1 | 5 mg                                   | 12% |
| 2 | 10 mg                                  | 24% |
| 3 | 20 mg                                  | 24% |
| 4 | > 50 mg                                | 12% |
| 5 | I would initiate with THC only         | 12% |
| 6 | 2.5 mg                                 | 0%  |
| 7 | I would initiate with balanced THC:CBD | 18% |
| 8 | Abstain                                | 0%  |
| 9 | Total                                  | 17  |

The recommended starting dosing frequency of CBD for rapid dosing and titration is: (Daily dose divided into this frequency)

| # | Answer                                 | %   |
|---|----------------------------------------|-----|
| 1 | Once daily                             | 0%  |
| 2 | Twice daily                            | 71% |
| 3 | Three times daily                      | 18% |
| 4 | I would start with THC only            | 0%  |
| 5 | Abstain                                | 0%  |
| 6 | I would initiate with balanced THC:CBD | 12% |
| 7 | Total                                  | 17  |

The recommended CBD titration amount for rapid dosing and titration:

| # | Answer                      | %   |
|---|-----------------------------|-----|
| 1 | 5 mg                        | 12% |
| 2 | 10 mg                       | 41% |
| 3 | 20 mg                       | 12% |
| 4 | > 20 mg                     | 18% |
| 5 | I would start with THC only | 6%  |
| 6 | Abstain                     | 0%  |
| 7 | 2.5 mg                      | 0%  |

|   |                                        |       |
|---|----------------------------------------|-------|
| 8 | I would initiate with balanced THC:CBD | 12%   |
| 9 | Total                                  | 1700% |

**The recommended CBD up-titration frequency for rapid dosing and titration:**

| # | Answer                                 | %   |
|---|----------------------------------------|-----|
| 1 | Daily                                  | 12% |
| 2 | Every other day                        | 65% |
| 3 | Once a week                            | 6%  |
| 4 | Abstain                                | 0%  |
| 5 | I would initiate with THC only         | 6%  |
| 6 | I would initiate with balanced THC:CBD | 12% |
| 7 | Total                                  | 17  |

**The recommended maximum daily dose of CBD for rapid dosing and titration:**

| # | Answer                                 | %   |
|---|----------------------------------------|-----|
| 1 | 100 mg                                 | 24% |
| 2 | 300 mg                                 | 18% |
| 3 | 600 mg                                 | 0%  |
| 4 | No maximum daily dose                  | 29% |
| 5 | I would start with THC only            | 12% |
| 6 | I would initiate with balanced THC:CBD | 18% |
| 7 | Total                                  | 17  |

**The recommended initiating THC:CBD ratio for patients with chronic pain requiring conservative dosing and titration is:**

| # | Question                                                  | Strongly Disagree | Disagree | Neutral | Agree | Strongly agree | Abstain | Total | Strongly Disagree/ Disagree | Strongly Agree/ Agree |
|---|-----------------------------------------------------------|-------------------|----------|---------|-------|----------------|---------|-------|-----------------------------|-----------------------|
| 1 | CBD predominant                                           | 6%                | 0%       | 12%     | 29%   | 53%            | 0%      | 17    | 6%                          | 82%                   |
| 2 | CBD predominant in the day and THC predominant at bedtime | 7%                | 20%      | 33%     | 33%   | 13%            | 0%      | 15    | 20%                         | 46%                   |
| 3 | Balanced THC:CBD                                          | 0%                | 20%      | 20%     | 47%   | 7%             | 0%      | 15    | 27%                         | 54%                   |

**The initiating CBD daily dose for patients with chronic pain requiring conservative dosing and titration: (total amount in 24 hours)**

| # | Answer | %   |
|---|--------|-----|
| 1 | 5 mg   | 41% |
| 2 | 10 mg  | 35% |
| 3 | 20 mg  | 24% |
| 4 | Total  | 17  |

**The recommended CBD titration amount for conservative dosing and titration is:**

| # | Answer  | %   |
|---|---------|-----|
| 1 | 1 mg    | 6%  |
| 2 | 5 mg    | 53% |
| 3 | 10 mg   | 24% |
| 4 | 20 mg   | 6%  |
| 5 | > 20 mg | 12% |
| 6 | Total   | 17  |

**The recommended CBD up-titration frequency for conservative dosing and titration is:**

| # | Answer          | %   |
|---|-----------------|-----|
| 1 | Daily           | 6%  |
| 2 | Every other day | 24% |
| 3 | Once a week     | 53% |
| 4 | Every 2 weeks   | 18% |
| 5 | Total           | 17  |

**The recommended maximum daily dose of CBD for conservative dosing and titration is:**

| # | Answer                | %   |
|---|-----------------------|-----|
| 1 | 50 mg                 | 6%  |
| 2 | 100 mg                | 35% |
| 3 | 300 mg                | 29% |
| 4 | No maximum daily dose | 29% |
| 5 | Abstain               | 0%  |
| 6 | Total                 | 17  |

**For conservative dosing, after initiating with a CBD predominant variety and target symptom relief has not been obtained, THC should be introduced:**

| # | Question                                                               | Strongly Disagree | Disagree | Neutral | Agree | Strongly agree | Abstain | Total | Strongly Disagree/ Disagree | Strongly Agree/ Agree |
|---|------------------------------------------------------------------------|-------------------|----------|---------|-------|----------------|---------|-------|-----------------------------|-----------------------|
| 1 | At bedtime once patient is taking > 20mg of CBD                        | 6%                | 19%      | 50%     | 6%    | 13%            | 6%      | 16    | 25%                         | 19%                   |
| 2 | At bedtime once patient is taking > 40mg of CBD                        | 6%                | 12%      | 35%     | 35%   | 12%            | 0%      | 17    | 18%                         | 47%                   |
| 3 | At bedtime when the patient is on maximally tolerated CBD dose         | 0%                | 24%      | 12%     | 29%   | 35%            | 0%      | 17    | 24%                         | 64%                   |
| 4 | At bedtime when the patient is on maximal affordable CBD dose          | 0%                | 13%      | 13%     | 25%   | 44%            | 6%      | 16    | 13%                         | 69%                   |
| 5 | I do not recommend starting with CBD predominant before initiating THC | 31%               | 25%      | 19%     | 13%   | 13%            | 0%      | 16    | 56%                         | 26%                   |

**The recommended THC up-titration frequency for patients with chronic pain requiring conservative dosing and titration:**

| # | Answer          | %   |
|---|-----------------|-----|
| 1 | Every other day | 18% |
| 2 | Once a week     | 59% |
| 3 | Every 2 weeks   | 24% |
| 4 | Total           | 17  |

**The recommended maximum daily dose of THC for patients with chronic pain requiring conservative dosing and titration:**

| # | Answer                | %   |
|---|-----------------------|-----|
| 1 | 10 mg                 | 12% |
| 2 | 20 mg                 | 53% |
| 3 | 40 mg                 | 18% |
| 4 | 80 mg                 | 12% |
| 5 | No maximum daily dose | 6%  |
| 6 | Total                 | 17  |

**The preferred method for inhaled medical cannabis is:**

| # | Question                                                                            | Strongly Disagree | Disagree | Neutral | Agree | Strongly agree | Abstain | Total | Strongly Disagree/ Disagree | Strongly Agree/ Agree |
|---|-------------------------------------------------------------------------------------|-------------------|----------|---------|-------|----------------|---------|-------|-----------------------------|-----------------------|
| 1 | Smoking dried cannabis flower                                                       | 59%               | 24%      | 6%      | 0%    | 0%             | 0%      | 12%   | 83%                         | 0%                    |
| 2 | Vaporization of dried cannabis flower                                               | 0%                | 0%       | 6%      | 0%    | 41%            | 41%     | 12%   | 0%                          | 41%                   |
| 3 | Vaporization of cannabis extract                                                    | 6%                | 12%      | 12%     | 6%    | 24%            | 24%     | 18%   | 18%                         | 30%                   |
| 4 | I will not prescribe/authorize inhaled medical cannabis for chronic pain management | 59%               | 12%      | 0%      | 12%   | 6%             | 12%     | 0%    | 71%                         | 18%                   |

**The patients where inhaled cannabis should be considered for chronic pain management.**

| # | Question                                       | Strongly Disagree | Disagree | Neutral | Agree | Strongly agree | Abstain | Total | Strongly Disagree/ Disagree | Strongly Agree/ Agree |
|---|------------------------------------------------|-------------------|----------|---------|-------|----------------|---------|-------|-----------------------------|-----------------------|
| 1 | Patients currently using inhaled cannabis      | 0%                | 18%      | 18%     | 35%   | 18%            | 12%     | 17    | 18%                         | 53%                   |
| 2 | Patients refusing to use oral cannabis extract | 6%                | 12%      | 12%     | 41%   | 18%            | 12%     | 17    | 18%                         | 59%                   |
| 3 | Abstain                                        | 15%               | 15%      | 23%     | 8%    | 0%             | 38%     | 13    | 30%                         | 8%                    |

**Q51 - The recommended initiating THC:CBD ratio for patients with chronic pain for inhaled use:**

| # | Question                                                  | Strongly Disagree | Disagree | Neutral | Agree | Strongly agree | Abstain | Total | Strongly Disagree/ Disagree | Strongly Agree/ Agree |
|---|-----------------------------------------------------------|-------------------|----------|---------|-------|----------------|---------|-------|-----------------------------|-----------------------|
| 1 | CBD predominant                                           | 6%                | 18%      | 35%     | 6%    | 24%            | 12%     | 17    | 24%                         | 30%                   |
| 2 | CBD predominant in the day and THC predominant at bedtime | 0%                | 29%      | 12%     | 41%   | 6%             | 12%     | 17    | 29%                         | 47%                   |
| 3 | Balanced THC:CBD                                          | 0%                | 6%       | 0%      | 53%   | 29%            | 12%     | 17    | 6%                          | 82%                   |
| 4 | THC predominant                                           | 24%               | 24%      | 0%      | 29%   | 12%            | 12%     | 17    | 48%                         | 41%                   |

**The starting dose of medical cannabis for inhaled use:**

| # | Answer        | %   |
|---|---------------|-----|
| 1 | 1 inhalation  | 59% |
| 2 | 2 inhalations | 24% |
| 3 | Abstain       | 18% |
| 4 | Total         | 17  |

**The recommended daily dosing for inhaled cannabis is:**

| # | Answer                             | %   |
|---|------------------------------------|-----|
| 1 | Twice daily when required          | 24% |
| 2 | Four times daily when required     | 24% |
| 3 | Every 4 hours when required        | 35% |
| 4 | I don't recommend inhaled cannabis | 0%  |
| 5 | Abstain                            | 18% |
| 6 | Total                              | 17  |

**The recommended up-titration amount for medical cannabis for inhaled use is:**

| # | Answer                             | %   |
|---|------------------------------------|-----|
| 1 | 1 inhalation                       | 71% |
| 2 | 2 inhalations                      | 12% |
| 3 | I don't recommend inhaled cannabis | 0%  |
| 4 | Abstain                            | 18% |
| 5 | Total                              | 17  |

**The THC:CBD ratio for treating breakthrough pain in patients with chronic pain is:**

| # | Answer           | Strongly Disagree | Disagree | Neutral | Agree | Strongly agree | Abstain | Total | Strongly Disagree/ Disagree | Strongly Agree/ Agree |
|---|------------------|-------------------|----------|---------|-------|----------------|---------|-------|-----------------------------|-----------------------|
| 1 | Balanced THC:CBD | 0%                | 6%       | 12%     | 53%   | 29%            | 6%      | 17    | 6%                          | 82%                   |
| 2 | THC predominant  | 0%                | 19%      | 6%      | 50%   | 25%            | 0%      | 17    | 19%                         | 75%                   |

**The recommended dosing and administration considerations for treating breakthrough pain with medical cannabis are:**

| # | Question                                                                                     | Strongly Disagree | Disagree | Neutral | Agree | Strongly agree | Abstain | Total | Strongly Disagree/ Disagree | Strongly Agree/ Agree |
|---|----------------------------------------------------------------------------------------------|-------------------|----------|---------|-------|----------------|---------|-------|-----------------------------|-----------------------|
| 1 | Clinicians should increase the dose of the same cannabis product to manage breakthrough pain | 0%                | 18%      | 12%     | 47%   | 18%            | 6%      | 17    | 18%                         | 65%                   |
| 2 | Clinicians should increase the THC dose to manage the patient's breakthrough pain            | 0%                | 18%      | 24%     | 41%   | 18%            | 0%      | 17    | 18%                         | 59%                   |
| 3 | Clinicians should add as needed oral cannabis to manage breakthrough pain                    | 18%               | 12%      | 12%     | 41%   | 18%            | 0%      | 17    | 30%                         | 59%                   |
| 4 | Clinicians should increase the CBD dose to manage the patient's breakthrough pain            | 12%               | 47%      | 24%     | 18%   | 0%             | 0%      | 17    | 59%                         | 18%                   |

**The monitoring frequency of a patient who is STARTING on medical cannabis is:**

| # | Question      | Strongly Disagree | Disagree | Neutral | Agree | Strongly agree | Abstain | Total | Strongly Disagree/ Disagree | Strongly Agree/ Agree |
|---|---------------|-------------------|----------|---------|-------|----------------|---------|-------|-----------------------------|-----------------------|
| 1 | Once weekly   | 13%               | 19%      | 31%     | 25%   | 13%            | 0%      | 16    | 32%                         | 38%                   |
| 2 | Twice monthly | 0%                | 24%      | 6%      | 47%   | 24%            | 0%      | 17    | 24%                         | 71%                   |
| 3 | Once monthly  | 6%                | 19%      | 19%     | 19%   | 38%            | 0%      | 16    | 25%                         | 57%                   |

**Medical cannabis titration should be stopped when:**

| # | Question                                                      | Strongly Disagree | Disagree | Neutral | Agree | Strongly agree | Abstain | Total | Strongly Disagree/ Disagree | Strongly Agree/ Agree |
|---|---------------------------------------------------------------|-------------------|----------|---------|-------|----------------|---------|-------|-----------------------------|-----------------------|
| 1 | The patient has reached a > 30% reduction in pain intensity   | 12%               | 18%      | 6%      | 59%   | 6%             | 0%      | 17    | 30%                         | 65%                   |
| 2 | The patient has reached an improvement in function            | 6%                | 0%       | 18%     | 47%   | 29%            | 0%      | 17    | 6%                          | 76%                   |
| 3 | The patient experiences mild cannabis-related adverse effects | 0%                | 41%      | 12%     | 35%   | 12%            | 0%      | 17    | 41%                         | 47%                   |
| 4 | The patient's chronic pain goals are being met                | 0%                | 0%       | 0%      | 29%   | 71%            | 0%      | 17    | 0%                          | 100%                  |

**Medical cannabis treatment should be stopped and discontinued when:**

| # | Question                                                                                   | Strongly Disagree | Disagree | Neutral | Agree | Strongly agree | Abstain | Total | Strongly Disagree/ Disagree | Strongly Agree/ Agree |
|---|--------------------------------------------------------------------------------------------|-------------------|----------|---------|-------|----------------|---------|-------|-----------------------------|-----------------------|
| 1 | The patient experiences mild cannabis-related adverse effects                              | 18%               | 65%      | 12%     | 6%    | 0%             | 0%      | 17    | 83%                         | 6%                    |
| 2 | The patient experiences moderate or severe cannabis-related adverse effects                | 0%                | 6%       | 0%      | 53%   | 41%            | 0%      | 17    | 6%                          | 94%                   |
| 3 | The medical cannabis is not providing pain relief after a dose increase                    | 6%                | 29%      | 29%     | 29%   | 6%             | 0%      | 17    | 35%                         | 35%                   |
| 4 | The maximum agreed upon dose in mg is reached and does not benefit the patient             | 6%                | 0%       | 6%      | 53%   | 35%            | 0%      | 17    | 6%                          | 88%                   |
| 5 | A patient experiences loss of efficacy after several dosage increases (Tolerance develops) | 0%                | 18%      | 18%     | 53%   | 12%            | 0%      | 17    | 18%                         | 65%                   |
| 6 | The patient has not responded on two different cannabis varieties                          | 18%               | 41%      | 12%     | 24%   | 6%             | 0%      | 17    | 59%                         | 30%                   |
| 7 | The patient has misuse or diversion                                                        | 0%                | 12%      | 6%      | 29%   | 53%            | 0%      | 17    | 12%                         | 82%                   |
| 8 | The patient has legal troubles or motor vehicle accidents                                  | 0%                | 12%      | 12%     | 24%   | 47%            | 6%      | 17    | 12%                         | 71%                   |

**CBD is associated with the following adverse effects:**

| # | Question               | Strongly Disagree | Disagree | Neutral | Agree | Strongly agree | Abstain | Total | Strongly Disagree/ Disagree | Strongly Agree/ Agree |
|---|------------------------|-------------------|----------|---------|-------|----------------|---------|-------|-----------------------------|-----------------------|
| 1 | Anxiety                | 29%               | 35%      | 18%     | 12%   | 6%             | 0%      | 17    | 64%                         | 18%                   |
| 2 | Fatigue or somnolence  | 6%                | 6%       | 24%     | 53%   | 0%             | 0%      | 17    | 12%                         | 65%                   |
| 3 | Short-term memory loss | 24%               | 41%      | 18%     | 12%   | 6%             | 0%      | 17    | 65%                         | 18%                   |

**THC is associated with the following adverse effects:**

| # | Question                                | Strongly Disagree | Disagree | Neutral | Agree | Strongly agree | Abstain | Total | Strongly Disagree/ Disagree | Strongly Agree/ Agree |
|---|-----------------------------------------|-------------------|----------|---------|-------|----------------|---------|-------|-----------------------------|-----------------------|
| 1 | Diarrhea                                | 6%                | 47%      | 6%      | 35%   | 0%             | 6%      | 17    | 53%                         | 35%                   |
| 2 | Appetite loss                           | 12%               | 59%      | 6%      | 18%   | 0%             | 6%      | 17    | 71%                         | 18%                   |
| 3 | Xerostomia                              | 0%                | 6%       | 24%     | 18%   | 47%            | 6%      | 17    | 6%                          | 65%                   |
| 4 | Sensitivity reactions (e.g. rash, itch) | 0%                | 24%      | 53%     | 24%   | 0%             | 0%      | 17    | 24%                         | 24%                   |
| 5 | Nausea and vomiting                     | 0%                | 18%      | 18%     | 59%   | 6%             | 0%      | 17    | 18%                         | 65%                   |

**Goals for using medical cannabis include:**

| # | Question                                           | Strongly Disagree | Disagree | Neutral | Agree | Strongly agree | Abstain | Total | Strongly Disagree/ Disagree | Strongly Agree/ Agree |
|---|----------------------------------------------------|-------------------|----------|---------|-------|----------------|---------|-------|-----------------------------|-----------------------|
| 1 | Reduce NSAID use                                   | 0%                | 0%       | 12%     | 71%   | 18%            | 0%      | 17    | 0%                          | 89%                   |
| 2 | Reduce antidepressant use                          | 0%                | 29%      | 18%     | 41%   | 12%            | 0%      | 17    | 29%                         | 53%                   |
| 3 | Reduce neuroleptic use                             | 0%                | 29%      | 18%     | 41%   | 12%            | 0%      | 17    | 29%                         | 53%                   |
| 4 | Reduce corticosteroid use                          | 0%                | 12%      | 18%     | 47%   | 18%            | 6%      | 17    | 12%                         | 65%                   |
| 5 | Reduce legal substance use (e.g. alcohol, tobacco) | 0%                | 12%      | 6%      | 53%   | 24%            | 6%      | 17    | 12%                         | 77%                   |

**The place in therapy for medical cannabis for Mixed pain is:**

| # | Question                                                          | Strongly Disagree | Disagree | Neutral | Agree | Strongly agree | Abstain | Total | Strongly Disagree/ Disagree | Strongly Agree/ Agree |
|---|-------------------------------------------------------------------|-------------------|----------|---------|-------|----------------|---------|-------|-----------------------------|-----------------------|
| 1 | As a first-line therapy after non-pharmacotherapy options         | 12%               | 82%      | 0%      | 6%    | 0%             | 0%      | 17    | 94%                         | 6%                    |
| 2 | Before acetaminophen (paracetamol) and NSAIDs                     | 12%               | 76%      | 6%      | 0%    | 6%             | 0%      | 17    | 88%                         | 6%                    |
| 3 | Before antidepressants without signs of major depressive disorder | 0%                | 71%      | 6%      | 24%   | 0%             | 0%      | 17    | 71%                         | 24%                   |
| 4 | Before anti-epileptics                                            | 0%                | 53%      | 18%     | 18%   | 12%            | 0%      | 17    | 53%                         | 30%                   |
| 5 | Before opioids                                                    | 0%                | 6%       | 18%     | 47%   | 29%            | 0%      | 17    | 6%                          | 76%                   |

**The place in therapy for medical cannabis for Neuropathic pain is:**

| # | Question                                                  | Strongly Disagree | Disagree | Neutral | Agree | Strongly agree | Abstain | Total | Strongly Disagree/ Disagree | Strongly Agree/ Agree |
|---|-----------------------------------------------------------|-------------------|----------|---------|-------|----------------|---------|-------|-----------------------------|-----------------------|
| 1 | As a first-line therapy after non-pharmacotherapy options | 0%                | 88%      | 0%      | 6%    | 6%             | 0%      | 17    | 88%                         | 12%                   |

|   |                                                                   |    |     |     |     |     |    |    |     |     |
|---|-------------------------------------------------------------------|----|-----|-----|-----|-----|----|----|-----|-----|
| 2 | Before acetaminophen (paracetamol) and NSAIDs                     | 6% | 59% | 0%  | 24% | 12% | 0% | 17 | 65% | 36% |
| 3 | Before antidepressants without signs of major depressive disorder | 0% | 76% | 0%  | 18% | 6%  | 0% | 17 | 76% | 24% |
| 4 | Before anti-epileptics                                            | 0% | 76% | 6%  | 6%  | 12% | 0% | 17 | 76% | 18% |
| 5 | Before opioids                                                    | 0% | 0%  | 24% | 35% | 41% | 0% | 17 | 0%  | 76% |

**The place in therapy for medical cannabis for Inflammatory pain is:**

| # | Question                                                          | Strongly Disagree | Disagree | Neutral | Agree | Strongly agree | Abstain | Total | Strongly Disagree/ Disagree | Strongly Agree/ Agree |
|---|-------------------------------------------------------------------|-------------------|----------|---------|-------|----------------|---------|-------|-----------------------------|-----------------------|
| 1 | As a first-line therapy after non-pharmacotherapy options         | 12%               | 71%      | 12%     | 6%    | 0%             | 0%      | 17    | 83%                         | 6%                    |
| 2 | Before acetaminophen (paracetamol) and NSAIDs                     | 29%               | 71%      | 0%      | 0%    | 0%             | 0%      | 17    | 100%                        | 0%                    |
| 3 | Before antidepressants without signs of major depressive disorder | 6%                | 41%      | 6%      | 35%   | 12%            | 0%      | 17    | 47%                         | 47%                   |
| 4 | Before anti-epileptics                                            | 6%                | 18%      | 12%     | 47%   | 18%            | 0%      | 17    | 24%                         | 65%                   |
| 5 | Before opioids                                                    | 6%                | 6%       | 18%     | 47%   | 24%            | 0%      | 17    | 12%                         | 71%                   |

**The place in therapy for medical cannabis for Nociceptive pain is:**

| # | Question                                                          | Strongly Disagree | Disagree | Neutral | Agree | Strongly agree | Abstain | Total | Strongly Disagree/ Disagree | Strongly Agree/ Agree |
|---|-------------------------------------------------------------------|-------------------|----------|---------|-------|----------------|---------|-------|-----------------------------|-----------------------|
| 1 | As a first-line therapy after non-pharmacotherapy options         | 12%               | 65%      | 6%      | 12%   | 0%             | 6%      | 17    | 77%                         | 12%                   |
| 2 | Before acetaminophen (paracetamol) and NSAIDs                     | 18%               | 71%      | 0%      | 0%    | 6%             | 6%      | 17    | 89%                         | 6%                    |
| 3 | Before antidepressants without signs of major depressive disorder | 12%               | 53%      | 6%      | 18%   | 6%             | 6%      | 17    | 65%                         | 24%                   |
| 4 | Before anti-epileptics                                            | 12%               | 53%      | 12%     | 6%    | 12%            | 6%      | 17    | 65%                         | 18%                   |
| 5 | Before opioids                                                    | 6%                | 6%       | 6%      | 53%   | 24%            | 6%      | 17    | 12%                         | 77%                   |

**The place in therapy for medical cannabis for Chronic Headache/Migraine is:**

| # | Question                                                          | Strongly Disagree | Disagree | Neutral | Agree | Strongly agree | Abstain | Total | Strongly Disagree/ Disagree | Strongly Agree/ Agree |
|---|-------------------------------------------------------------------|-------------------|----------|---------|-------|----------------|---------|-------|-----------------------------|-----------------------|
| 1 | Before opioids                                                    | 0%                | 0%       | 6%      | 24%   | 59%            | 12%     | 17    | 0%                          | 83%                   |
| 2 | Before anti-epileptics                                            | 6%                | 53%      | 12%     | 12%   | 6%             | 12%     | 17    | 59%                         | 18%                   |
| 3 | Before antidepressants without signs of major depressive disorder | 6%                | 53%      | 12%     | 6%    | 12%            | 12%     | 17    | 59%                         | 18%                   |
| 4 | Before acetaminophen (paracetamol) and NSAIDs                     | 18%               | 65%      | 0%      | 6%    | 0%             | 12%     | 17    | 83%                         | 6%                    |
| 5 | As a first-line therapy after non-pharmacotherapy options         | 24%               | 59%      | 0%      | 6%    | 0%             | 12%     | 17    | 83%                         | 6%                    |
