# Supplementary material
Source: PubMed Central journal article supplement (PMC8254373)
Supplement: 42238_2021_73_MOESM4_ESM.pdf [file 42238_2021_73_MOESM4_ESM.pdf]

## Consensus Virtual Voting Round 1 Results

Consensus Reached with  $\geq 75\%$

n=20

The minimum age for use of THC in patients with chronic pain is:

| # | Answer          | Total | %      |
|---|-----------------|-------|--------|
| 1 | 25 years of age | 5     | 26.3%  |
| 2 | 21 years of age | 4     | 21.1%  |
| 3 | 18 years of age | 5     | 26.3%  |
| 4 | No minimum age  | 5     | 26.3%  |
|   | Total           | 19    | 100.0% |

The initiating THC:CBD ratio for patients with chronic pain requiring routine dosing and titration should be:

| # | Question                                                          | Total | %     |
|---|-------------------------------------------------------------------|-------|-------|
| 1 | CBD predominant                                                   | 13    | 65.0% |
| 2 | CBD predominant during the day and add THC predominant at bedtime | 1     | 5.0%  |
| 3 | Balanced THC:CBD                                                  | 6     | 30.0% |
| 4 | THC predominant                                                   | 0     | 0.0%  |
|   | Total                                                             | 20    |       |

The initiating CBD daily dose for routine dosing and titration is: (total amount in 24 hours)

| # | Answer | Total | %      |
|---|--------|-------|--------|
| 1 | 5 mg   | 1     | 5.0%   |
| 2 | 10 mg  | 15    | 75.0%  |
| 3 | 20 mg  | 1     | 5.0%   |
| 4 | 50 mg  | 3     | 15.0%  |
|   | Total  | 20    | 100.0% |

The recommended CBD titration amount for routine dosing and titration is:

| # | Answer | Total | %      |
|---|--------|-------|--------|
| 1 | 5 mg   | 1     | 5.0%   |
| 2 | 10 mg  | 16    | 80.0%  |
| 3 | 20 mg  | 3     | 15.0%  |
|   | Total  | 20    | 100.0% |

The recommended CBD up-titration frequency for routine dosing and administration is:

| # | Answer            | Total | %      |
|---|-------------------|-------|--------|
| 1 | Daily             | 0     | 0.0%   |
| 2 | Every 2 to 3 days | 17    | 85.0%  |
| 3 | Once a week       | 3     | 15.0%  |
|   | Total             | 20    | 100.0% |

The recommended maximum daily dose of CBD for routine dosing and administration is:

| # | Answer                | Total | %      |
|---|-----------------------|-------|--------|
| 1 | 100 mg                | 4     | 20.0%  |
| 2 | 300 mg                | 11    | 55.0%  |
| 3 | No maximum daily dose | 5     | 25.0%  |
|   | Total                 | 20    | 100.0% |

For routine dosing and titration, after initiating with a CBD predominant variety and target symptom relief has not been obtained, THC should be introduced:

| # | Answer                                                                 | Total | %      |
|---|------------------------------------------------------------------------|-------|--------|
| 1 | At bedtime once patient is taking $\geq 20$ mg of CBD                  | 3     | 15.0%  |
| 2 | At bedtime once patient is taking $\geq 40$ mg of CBD                  | 15    | 75.0%  |
| 3 | I do not recommend starting with CBD predominant before initiating THC | 2     | 10.0%  |
|   | Total                                                                  | 20    | 100.0% |

The recommended THC up-titration frequency for routine dosing and administration is:

| # | Answer            | Total | %      |
|---|-------------------|-------|--------|
| 1 | Every 2 to 3 days | 14    | 70.0%  |
| 2 | Once a week       | 6     | 30.0%  |
| 3 | Every 2 weeks     | 0     | 0.0%   |
|   | Total             | 20    | 100.0% |

The recommended maximum daily dose of THC for routine dosing and administration is:

| # | Answer                | Total | %     |
|---|-----------------------|-------|-------|
| 1 | 20 mg                 | 0     | 0.0%  |
| 2 | 40 mg                 | 14    | 70.0% |
| 3 | 80 mg                 | 5     | 25.0% |
| 4 | No maximum daily dose | 1     | 5.0%  |

|  |       |    |        |
|--|-------|----|--------|
|  | Total | 20 | 100.0% |
|--|-------|----|--------|

If a patient is not achieving treatment goals with once daily THC at bedtime, clinicians can consider dosing THC up to:

| # | Answer            | Total | %      |
|---|-------------------|-------|--------|
| 1 | Twice daily       | 0     | 0.0%   |
| 2 | Three times daily | 12    | 60.0%  |
| 3 | Four times daily  | 8     | 40.0%  |
|   | Total             | 20    | 100.0% |

The initiating CBD daily dose for conservative dosing and titration is: (total amount in 24 hours):

| # | Answer | Total | %      |
|---|--------|-------|--------|
| 1 | 5 mg   | 5     | 29.4%  |
| 2 | 10 mg  | 8     | 47.1%  |
| 3 | 20 mg  | 4     | 23.5%  |
|   | Total  | 17    | 100.0% |

The recommended starting dosing frequency for CBD is: (Daily dose divided into this frequency)

| # | Answer      | Total | %      |
|---|-------------|-------|--------|
| 1 | Once daily  | 12    | 63.2%  |
| 2 | Twice daily | 7     | 36.8%  |
|   | Total       | 19    | 100.0% |

The recommended CBD titration amount for conservative dosing and titration is:

| # | Answer | Total | %      |
|---|--------|-------|--------|
| 1 | 1 mg   | 0     | 0.0%   |
| 2 | 5 mg   | 7     | 38.9%  |
| 3 | 10 mg  | 9     | 50.0%  |
| 4 | 20 mg  | 1     | 5.6%   |
| 5 | >20 mg | 1     | 5.6%   |
|   | Total  | 18    | 100.0% |

The recommended CBD up-titration frequency for conservative dosing and titration is:

| # | Answer            | Total | %      |
|---|-------------------|-------|--------|
| 1 | Daily             | 1     | 5.0%   |
| 2 | Every 2 to 3 days | 15    | 75.0%  |
| 3 | Once a week       | 4     | 20.0%  |
| 4 | Every 2 weeks     | 0     | 0.0%   |
|   | Total             | 20    | 100.0% |

The recommended maximum daily dose of CBD for conservative dosing and titration is:

| # | Answer                | Total | %      |
|---|-----------------------|-------|--------|
| 1 | 50 mg                 | 0     | 0.0%   |
| 2 | 100 mg                | 8     | 40.0%  |
| 3 | 300 mg                | 10    | 50.0%  |
| 4 | No maximum daily dose | 2     | 10.0%  |
|   | Total                 | 20    | 100.0% |

For conservative dosing, after initiating with a CBD predominant variety and target symptom relief has not been obtained, THC should be introduced:

| # | Answer                                                                 | Total | %      |
|---|------------------------------------------------------------------------|-------|--------|
| 1 | At bedtime once patient is taking >= 20mg of CBD                       | 4     | 21.1%  |
| 2 | At bedtime once patient is taking >= 40mg of CBD                       | 15    | 78.9%  |
| 3 | I do not recommend starting with CBD predominant before initiating THC | 0     | 0.0%   |
|   | Total                                                                  | 19    | 100.0% |

The recommended starting THC daily dose for patients with chronic pain requiring conservative dosing and titration: (amount for 24 hours)

| # | Answer | Total | %      |
|---|--------|-------|--------|
| 1 | 1 mg   | 17    | 94.4%  |
| 2 | 2.5 mg | 1     | 5.6%   |
|   | Total  | 18    | 100.0% |

The recommended THC titration amount is:

| # | Answer | Total | %      |
|---|--------|-------|--------|
| 1 | 1 mg   | 19    | 100.0% |
| 2 | 2.5 mg | 0     | 0.0%   |
|   | Total  | 19    | 100.0% |

The recommended THC up-titration frequency for patients with chronic pain requiring conservative dosing and titration:

| # | Answer            | Total | %     |
|---|-------------------|-------|-------|
| 1 | Daily             | 0     | 0.0%  |
| 2 | Every 2 to 3 days | 9     | 45.0% |
| 3 | Once a week       | 10    | 50.0% |
| 4 | Every 2 weeks     | 1     | 5.0%  |

|  |       |    |        |
|--|-------|----|--------|
|  | Total | 20 | 100.0% |
|--|-------|----|--------|

The recommended maximum daily dose of THC for patients with chronic pain requiring conservative dosing and titration:

| # | Answer                | Total | %      |
|---|-----------------------|-------|--------|
| 1 | 10 mg                 | 1     | 5.0%   |
| 2 | 20 mg                 | 2     | 10.0%  |
| 3 | 40 mg                 | 15    | 75.0%  |
| 4 | 80 mg                 | 2     | 10.0%  |
| 5 | No maximum daily dose | 0     | 0.0%   |
|   | Total                 | 20    | 100.0% |

If a patient is not achieving treatment goals with once daily THC at bedtime, clinicians can consider dosing THC up to:

| # | Answer            | Total | %      |
|---|-------------------|-------|--------|
| 1 | Twice daily       | 6     | 30.0%  |
| 2 | Three times daily | 11    | 55.0%  |
| 3 | Four times daily  | 3     | 15.0%  |
|   | Total             | 20    | 100.0% |
