# Supplementary material
Source: PubMed Central journal article supplement (PMC8254373)
Supplement: 42238_2021_73_MOESM5_ESM.pdf [file 42238_2021_73_MOESM5_ESM.pdf]

## Consensus Virtual Voting Round 2 Results

Consensus Reached with  $\geq 75\%$

n=19

The initiating THC:CBD ratio for patients with chronic pain requiring routine dosing and titration should be:

| # | Question                                                          | Total | %     |
|---|-------------------------------------------------------------------|-------|-------|
| 1 | CBD predominant                                                   | 17    | 89.0% |
| 2 | CBD predominant during the day and add THC predominant at bedtime | 1     | 5.0%  |
| 3 | Balanced THC:CBD                                                  | 1     | 5.0%  |
|   | Total                                                             | 19    | 99.0% |

The recommended maximum daily dose of THC for routine dosing and administration is:

| # | Answer          | Total | %      |
|---|-----------------|-------|--------|
| 1 | 20 mg           | 0     | 0.0%   |
| 2 | 40 mg           | 18    | 94.7%  |
| 3 | 80 mg           | 1     | 5.3%   |
| 4 | No maximum dose | 0     | 0.0%   |
|   | Total           | 19    | 100.0% |

The initiating CBD daily dose for conservative dosing and titration is: (total amount in 24 hours):

| # | Answer | Total | %      |
|---|--------|-------|--------|
| 1 | 5 mg   | 8     | 42.1%  |
| 2 | 10 mg  | 10    | 52.6%  |
| 3 | 20 mg  | 1     | 5.3%   |
|   | Total  | 19    | 100.0% |

The recommended starting dosing frequency for conservative dosing for CBD is: (Daily dose divided into this frequency)

| # | Answer      | Total | %      |
|---|-------------|-------|--------|
| 1 | Once daily  | 17    | 89.5%  |
| 2 | Twice daily | 2     | 10.5%  |
|   | Total       | 19    | 100.0% |

The recommended THC up-titration frequency for patients with chronic pain requiring conservative dosing and titration:

| # | Answer            | Total | %      |
|---|-------------------|-------|--------|
| 1 | Every 2 to 3 days | 0     | 0.0%   |
| 2 | Once a week       | 16    | 84.2%  |
| 3 | Every 5-10 days   | 3     | 15.8%  |
| 4 | Every 2 weeks     | 0     | 0.0%   |
|   | Total             | 19    | 100.0% |

The recommended maximum daily dose of THC for patients with chronic pain requiring rapid dosing and titration:

| # | Answer | Total | %      |
|---|--------|-------|--------|
| 1 | 40 mg  | 16    | 84.2%  |
| 2 | 60 mg  | 3     | 15.8%  |
| 3 | 80 mg  | 0     | 0.0%   |
|   | Total  | 19    | 100.0% |

If a patient is not achieving treatment goals, clinicians can consider dosing:

| # | Answer            | Total | %     |
|---|-------------------|-------|-------|
| 1 | Twice daily       | 0     | 0.0%  |
| 2 | Three times daily | 9     | 60.0% |
| 3 | Four times daily  | 6     | 40.0% |

|  |       |    |        |
|--|-------|----|--------|
|  | Total | 15 | 100.0% |
|--|-------|----|--------|

**The starting dose of medical cannabis for inhaled use is:**

| 1 | # | Answer        | Total | %      |
|---|---|---------------|-------|--------|
|   | 1 | 1 inhalation  | 15    | 83.3%  |
|   | 2 | 2 inhalations | 2     | 11.1%  |
|   | 3 | Abstain       | 1     | 5.6%   |
|   |   | Total         | 18    | 100.0% |

**The recommended daily dosing for inhaled cannabis is:**

| 1 | # | Answer                         | Total | %      |
|---|---|--------------------------------|-------|--------|
|   | 1 | Twice daily when required      | 0     | 0.0%   |
|   | 2 | Four times daily when required | 4     | 21.1%  |
|   | 3 | Every 4 hours when required    | 14    | 73.7%  |
|   | 4 | Abstain                        | 1     | 5.3%   |
|   |   | Total                          | 19    | 100.0% |

**The recommended up-titration amount for medical cannabis for inhaled use is:**

| 1 | # | Answer        | Total | %      |
|---|---|---------------|-------|--------|
|   | 1 | 1 inhalation  | 16    | 84.2%  |
|   | 2 | 2 inhalations | 2     | 10.5%  |
|   | 3 | Abstain       | 1     | 5.3%   |
|   |   | Total         | 19    | 100.0% |
